# Supplementary material for: New conjugated carbazole derivatives: synthesis and photophysical properties catalysed by Pd–Cu@rGO
Source: Royal Society of Chemistry journal article supplement (doi:10.1039/d3nj04408d), 2024-01-01
Supplement: d3nj04408d1.pdf [file d3nj04408d1.pdf]

## New Conjugated Carbazole Derivatives: Synthesis and Photophysical Properties Catalysed by Pd-Cu@ rGO

Vadla Bhagyalakshmi<sup>a</sup>, Meeniga Indira<sup>b</sup>, Shaik Farheen Banu<sup>b</sup>, Derangula Venkateswarlu<sup>c</sup>, Vasikarla Kamala Prasad<sup>d</sup>, Loka Subramanyam Sarma<sup>b</sup>, Cirandur Suresh Reddy<sup>a\*</sup>, Peddiahgari Vasu Govardhana Reddy<sup>b\*</sup>

<sup>a</sup>Department of Chemistry, Sri Venkateswara University, Tirupati, Andhra Pradesh, India

<sup>b</sup>Department of Chemistry, Yogi Vemana University, Kadapa, Andhra Pradesh, India

<sup>c</sup>Department of Polymers and Functional Materials, CSIR- Indian Institute of Chemical Technology, Hyderabad, Telangana, India

<sup>d</sup>Denisco Chemicals Private Ltd., Hyderabad, Telangana, India

### Supporting Information Table of Contents

| S. No. | Contents                                                                 | Pages   |
|--------|--------------------------------------------------------------------------|---------|
| I.     | Large area TEM Images ( <b>Figure S1</b> )                               | S2      |
| II.    | SEM Images of 10wt%Pd & 20wt%Pd ( <b>Figure S2</b> )                     | S3      |
| III.   | SEM Images of Pd-Ni@rGO ( <b>Figure S3</b> )                             | S4      |
| IV.    | EDS Spectrum and EDS mapping of Pd-Ni@rGO ( <b>Figure S4</b> )           | S5      |
| V.     | Comparison of results with reported literature (Table SI)                | S6-S7   |
| VI.    | Table SII                                                                | S8-S9   |
| VII.   | SEM Images of Fresh Pd-Cu@rGO ( <b>Figure S5</b> )                       | S9      |
| VIII.  | SEM Images of recovered Pd-Cu@rGO ( <b>Figure S6(a) &amp; S6(b)</b> )    | S10     |
| IX.    | EDS Spectrum and EDS mapping of recovered Pd-Cu@rGO ( <b>Figure S7</b> ) | S11     |
| X.     | CV ( <b>Figure S8</b> )                                                  | S12     |
| XI.    | Preparation of <i>N</i> -Protected Carbazoles                            | S13-S14 |
| XII.   | Characteristic data                                                      | S14-S24 |
| XIII.  | Copies of ( <sup>1</sup> H & <sup>13</sup> C NMR and HRMS Spectra)       | S24-S43 |
| XIV.   | References                                                               | S44-S45 |

I. Large area TEM images:

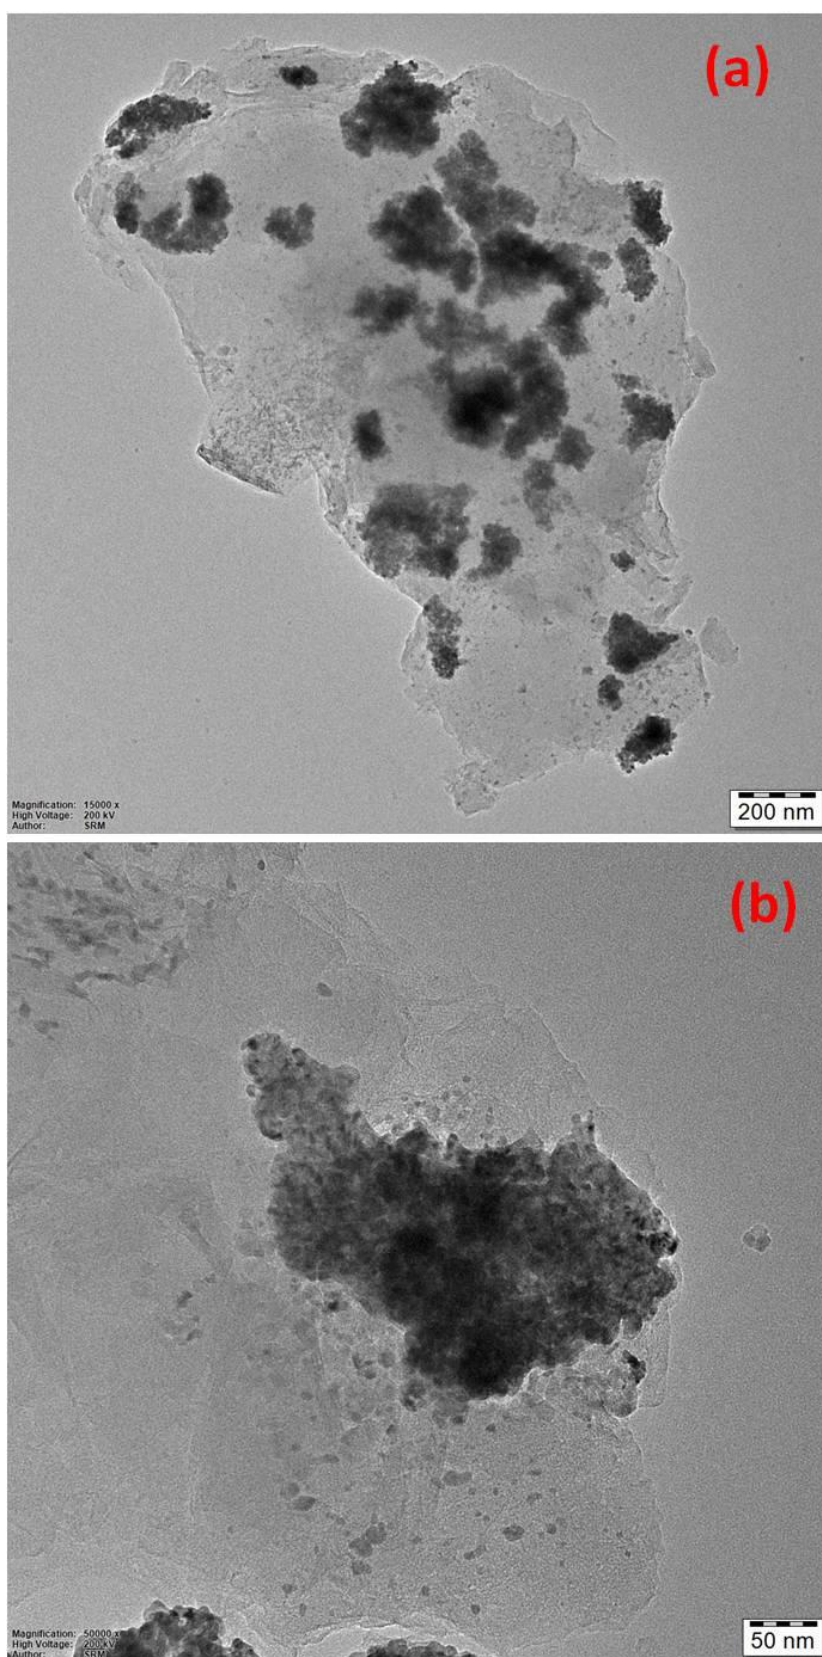

**Figure S1.** Large area TEM images (a) 200 nm scale and (b) 50 nm scale of Pd-Cu@rGO nanocomposite.

## II. SEM IMAGES (10wt%Pd &20wt%Pd):

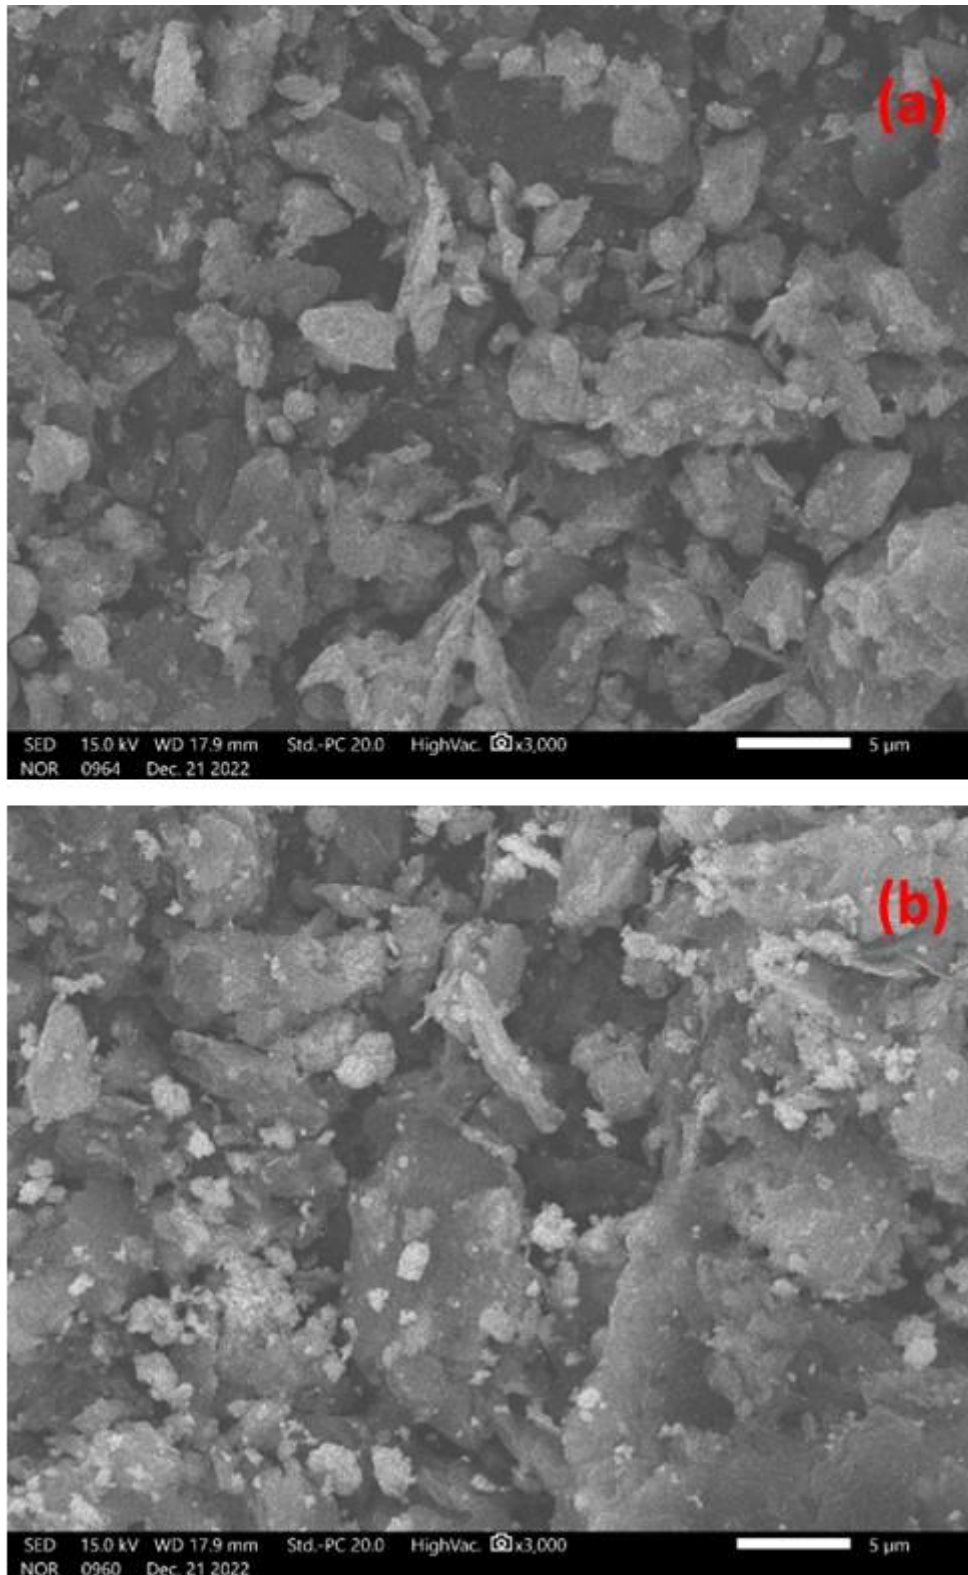

**Figure S2:** (a) SEM image of 10wt% Pd@rGO, (b) SEM image of 20wt%Pd.

### III. SEM image of Pd-Ni@rGO:

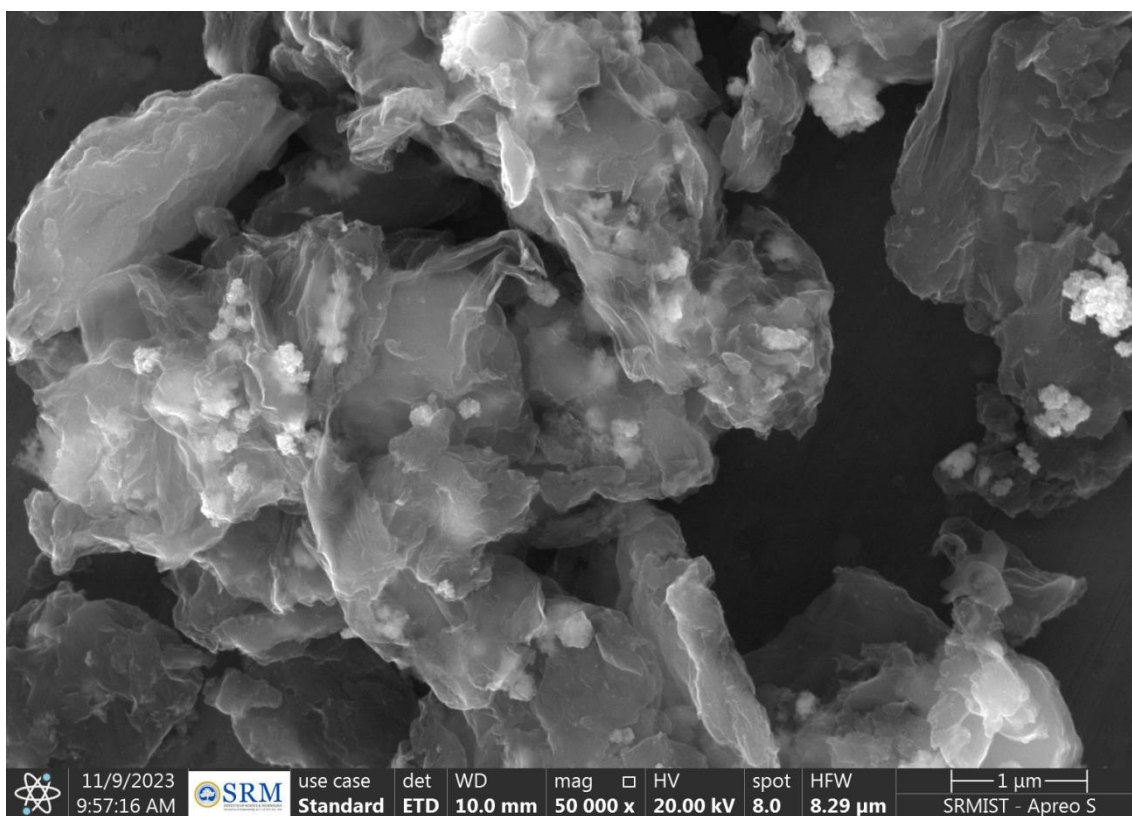

**Figure S3.** SEM image of Pd-Ni@rGO nanocomposite.

#### IV. EDS Spectrum and EDS mapping of Pd-Ni@rGO:

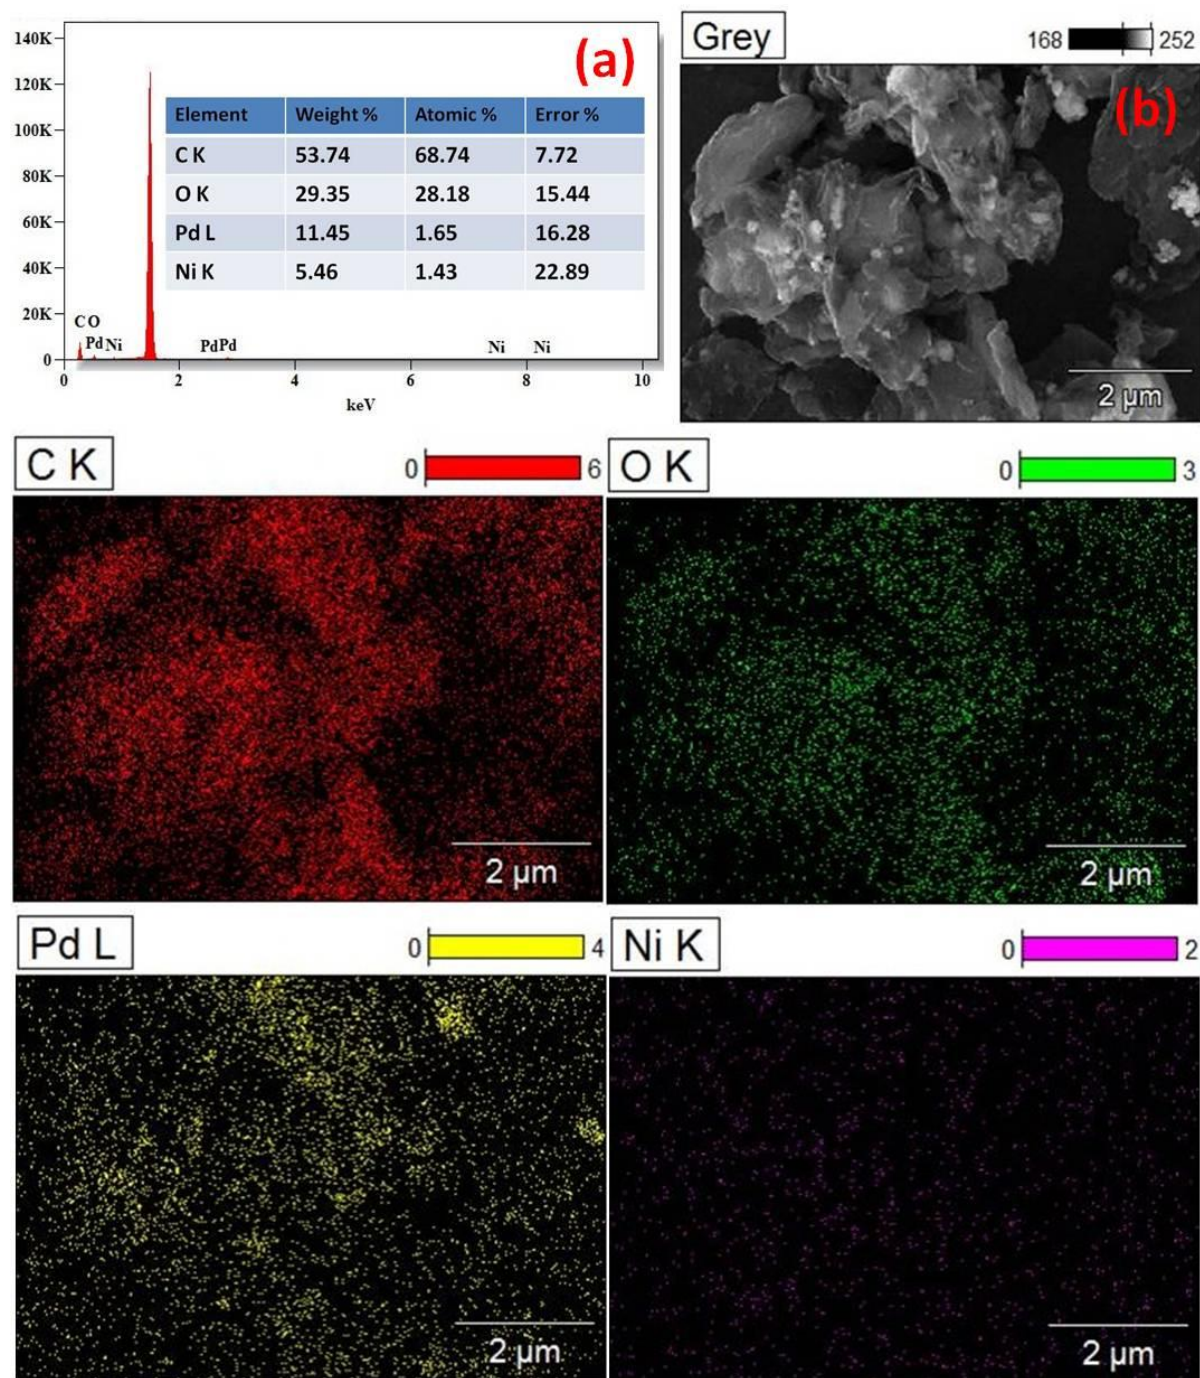

**Figure S4.** (a) EDS spectrum and (b) SEM micrograph and corresponding EDS mapping of Pd-Ni@rGO showing C (K), O (K), Pd (L) and Ni (K) images.

**V. Table S1: Comparison of results with reported literature.**

| Entry | Catalyst                             | Metal loading             | Substrate              | Temperature | Time  | Recyclability runs | Reference                               | Remarks                                                                                                                                 |
|-------|--------------------------------------|---------------------------|------------------------|-------------|-------|--------------------|-----------------------------------------|-----------------------------------------------------------------------------------------------------------------------------------------|
| 1.    | Pd-Cu@GO                             | Pd 29.34wt% + Cu 11.83wt% | Aryl bromides          | 100 °C      | 1h    | 7                  | A. Gupta et al. <sup>[1]</sup>          | Usage of organic solvent, high temperature, less substrate scope, high amount of catalyst. Only simple biphenyls were synthesized.      |
| 2.    | Pd-Cu NWs                            | Pd 61.80wt% + Cu 38.19wt% | Aryl bromides          | 80 °C       | 2h    | 5                  | L. V. Jing Jing et al. <sup>[2]</sup>   | High temperature, simple aryl bromides were studied. Only simple biphenyls were synthesized.                                            |
| 3.    | Pd-Co/Graphene                       | Pd 10wt% + Co 10wt%       | Aryl iodides, bromides | 80 °C       | 2-4h  | 5                  | Y. S. Feng et al. <sup>[3]</sup>        | High temperature, less substrate scope. Only simple biphenyls were synthesized.                                                         |
| 4.    | Au/Pd NPs                            | Pd 16wt% + Au 7wt%        | Iodo benzene           | 80 °C       | 24h   | 4                  | M. Nasrollahzadeh et al. <sup>[4]</sup> | Requires long reaction time, high temperature and high catalytic loadings. Only simple biphenyls were synthesized.                      |
| 5.    | Pd-Ni (20)/RGO                       | Ni 58.3wt% + Pd 1.9wt%    | Aryl halides           | 30-60 °C    | 3-24h | 5                  | R. Nie et al. <sup>[5]</sup>            | Long reaction time and high temperature required for bulky and electron withdrawing substrates. Only simple biphenyls were synthesized. |
| 6.    | Pd-Fe <sub>3</sub> O <sub>4</sub> @C | Pd 52.5wt%                | Aryl halides           | RT          | 2h    | 10                 | R. Li et al. <sup>[6]</sup>             | Less substrate scope, high catalytic weight % used. Only simple biphenyls were synthesized.                                             |
| 7.    | PdAu/Fe <sub>3</sub> O <sub>4</sub>  | Pd 0.57wt%+ Au 1.42wt%    | Bromo, iodo benzene    | 80 °C       | 9.5h  | 6                  | X. Chen et al. <sup>[7]</sup>           | Organic solvent was used, high temperature, long reaction time required. Only simple biphenyls were synthesized.                        |

|     |                     |                          |                                |       |     |   |                               |                                                                                                                                                                                                                                                                                   |
|-----|---------------------|--------------------------|--------------------------------|-------|-----|---|-------------------------------|-----------------------------------------------------------------------------------------------------------------------------------------------------------------------------------------------------------------------------------------------------------------------------------|
| 8.  | Pd-Cu/G             | Pd 1.4 wt% + Cu 1.6 wt%  | Aryl bromides                  | 60 °C | 10h | 5 | X. Ma et al. <sup>[8]</sup>   | High temperature, long reaction time required, less substrate scope. Only simple biphenyls were synthesized.                                                                                                                                                                      |
| 9.  | Pd/rGO              | Pd 5.4wt%                | Iodo benzene, bromo benzene    | 80 °C | 4h  | 4 | X. Wang et al. <sup>[9]</sup> | Requires high temperature, less substrate scope. Only simple biphenyls were synthesized.                                                                                                                                                                                          |
| 10. | PdNPs@QP OSS@rGO    | Pd 6.95wt%               | Aryl halides                   | 80 °C | 2h  | 5 | S. Xia et al. <sup>[10]</sup> | Requires high temperature, less substrate scope. Only simple biphenyls were synthesized.                                                                                                                                                                                          |
| 11. | Cu/C-700/Pd         | Cu 12.76wt% + Pd 0.45wt% | Aryl iodides                   | 120°C | 24h | 8 | L. Sun et al. <sup>[11]</sup> | Loading of high amount of catalyst, High temperature, long reaction time. Only simple biphenyls were synthesized.                                                                                                                                                                 |
| 12. | <b>Present Work</b> |                          |                                |       |     |   |                               |                                                                                                                                                                                                                                                                                   |
|     | Pd-Cu@rGO           | Pd 10wt% + Cu 10wt%      | 3-Bromo-N-protected carbazoles | RT    | 2h  | 5 | This work                     | 3-Bromocarbazole was used instead of simple aryl bromide, green solvents such as ionic liquids and ethanol-water (1:1) were used, photo physical properties were studied for the synthesized N-substituted carbazole derivatives. Reactions were carried out at room temperature. |

**VI. Table SII.** Optimization for SM coupling of biphenyl N-substituted 3-bromo carbazole with 4-methyl phenyl boronic acid catalyzed by rGO.

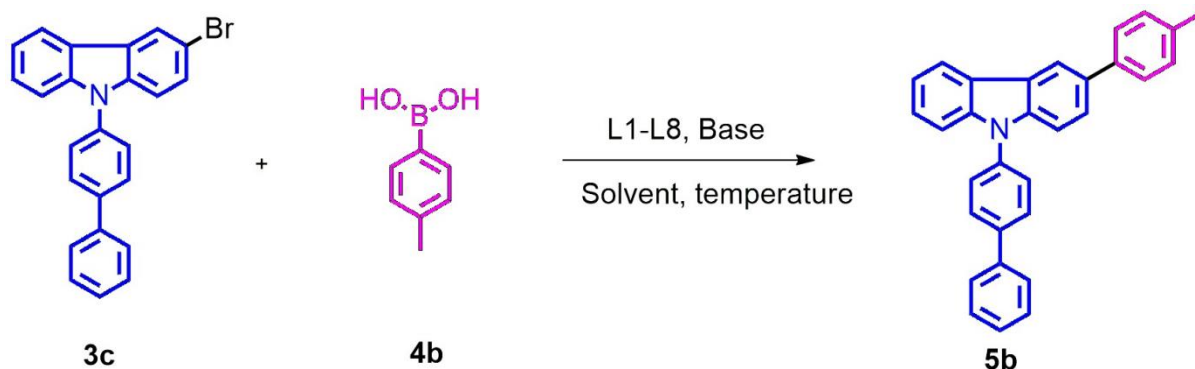

| Entry | Catalyst            | Catalyst Label | Base                            | Solvent               | Temperature (°C) | Time (h) | Yield(%) <sup>[a]</sup> |
|-------|---------------------|----------------|---------------------------------|-----------------------|------------------|----------|-------------------------|
| 1.    | -                   |                | K <sub>2</sub> CO <sub>3</sub>  | EtOH+H <sub>2</sub> O | RT               | 16       | NR                      |
| 2.    | -                   |                | K <sub>2</sub> CO <sub>3</sub>  | EtOH+H <sub>2</sub> O | 80               | 16       | NR                      |
| 3.    | 10wt%Pd@rGO         | L <sub>1</sub> | K <sub>2</sub> CO <sub>3</sub>  | EtOH+H <sub>2</sub> O | RT               | 8        | 60                      |
| 4.    | 20wt%Pd@rGO         | L <sub>2</sub> | K <sub>2</sub> CO <sub>3</sub>  | EtOH+H <sub>2</sub> O | RT               | 8        | 60                      |
| 5.    | 10wt%Pd-10wt%Cu@rGO | L <sub>3</sub> | K <sub>2</sub> CO <sub>3</sub>  | EtOH+H <sub>2</sub> O | RT               | 2        | 98                      |
| 6.    | 10wt%Pd-5wt%Cu@rGO  | L <sub>4</sub> | K <sub>2</sub> CO <sub>3</sub>  | EtOH+H <sub>2</sub> O | RT               | 2        | 60                      |
| 7.    | 5wt%Pd-10wt%Cu@rGO  | L <sub>5</sub> | K <sub>2</sub> CO <sub>3</sub>  | EtOH+H <sub>2</sub> O | RT               | 2        | 50                      |
| 8.    | 10wt%Pd-10wt%Ni@rGO | L <sub>6</sub> | K <sub>2</sub> CO <sub>3</sub>  | EtOH+H <sub>2</sub> O | RT               | 2        | 40                      |
| 9.    | 10wt%Pd-10wt%Ni@Rgo | L <sub>6</sub> | K <sub>2</sub> CO <sub>3</sub>  | EtOH+H <sub>2</sub> O | RT               | 8        | 70                      |
| 10.   | 10wt%Pd-5wt%Ni@rGO  | L <sub>7</sub> | K <sub>2</sub> CO <sub>3</sub>  | EtOH+H <sub>2</sub> O | RT               | 2        | 40                      |
| 11.   | 5wt%Pd-10wt%Ni@rGO  | L <sub>8</sub> | K <sub>2</sub> CO <sub>3</sub>  | EtOH+H <sub>2</sub> O | RT               | 2        | 30                      |
| 12.   | 10wt%Pd-10wt%Cu@rGO | L <sub>3</sub> | Na <sub>2</sub> CO <sub>3</sub> | EtOH+H <sub>2</sub> O | RT               | 2        | 70                      |
| 13.   | 10wt%Pd-10wt%Cu@rGO | L <sub>3</sub> | Cs <sub>2</sub> CO <sub>3</sub> | EtOH+H <sub>2</sub> O | RT               | 2        | 63                      |
| 14.   | 10wt%Pd-10wt%Cu@rGO | L <sub>3</sub> | NEt <sub>3</sub>                | EtOH+H <sub>2</sub> O | RT               | 2        | 40                      |
| 15.   | 10wt%Pd-10wt%Cu@rGO | L <sub>3</sub> | K <sub>2</sub> CO <sub>3</sub>  | Toluene               | RT               | 2        | 40                      |
| 16.   | 10wt%Pd-10wt%Cu@rGO | L <sub>3</sub> | K <sub>2</sub> CO <sub>3</sub>  | Toluene               | 80°C             | 2        | 75                      |



|     |                         |                |                                |                   |      |    |    |
|-----|-------------------------|----------------|--------------------------------|-------------------|------|----|----|
| 17. | 10wt%Pd-<br>10wt%Cu@rGO | L <sub>3</sub> | K <sub>2</sub> CO <sub>3</sub> | Acetonitrile      | RT   | 2  | 30 |
| 18. | 10wt%Pd-<br>10wt%Cu@rGO | L <sub>3</sub> | K <sub>2</sub> CO <sub>3</sub> | Acetonitrile      | 80°C | 2  | 50 |
| 19. | 10wt%Pd-<br>10wt%Cu@rGO | L <sub>3</sub> | K <sub>2</sub> CO <sub>3</sub> | 1,4-<br>dioxane   | RT   | 16 | 30 |
| 20. | 10wt%Pd-<br>10wt%Cu@rGO | L <sub>3</sub> | K <sub>2</sub> CO <sub>3</sub> | 1,4-<br>dioxane   | 100  | 4  | 60 |
| 21. | 10wt%Pd-<br>10wt%Cu@rGO | L <sub>3</sub> | K <sub>2</sub> CO <sub>3</sub> | IL <sup>(b)</sup> | 80   | 12 | 80 |

Reaction conditions: 9-((1,1'-Biphenyl)-4-yl)-3-bromo-9H-carbazole (1mmol), 4-methyl phenylboronic acid(1.1mmol), Solvent (1:1ml), catalyst (5 mg), Base (2 mmol), [a]; Isolated yield; [b] IL; 1-butyl-2-decyl-1H-imidazolium bromide ionic liquid) (0.2 mmol).

#### VII. SEM image of Pd-Cu@rGO:

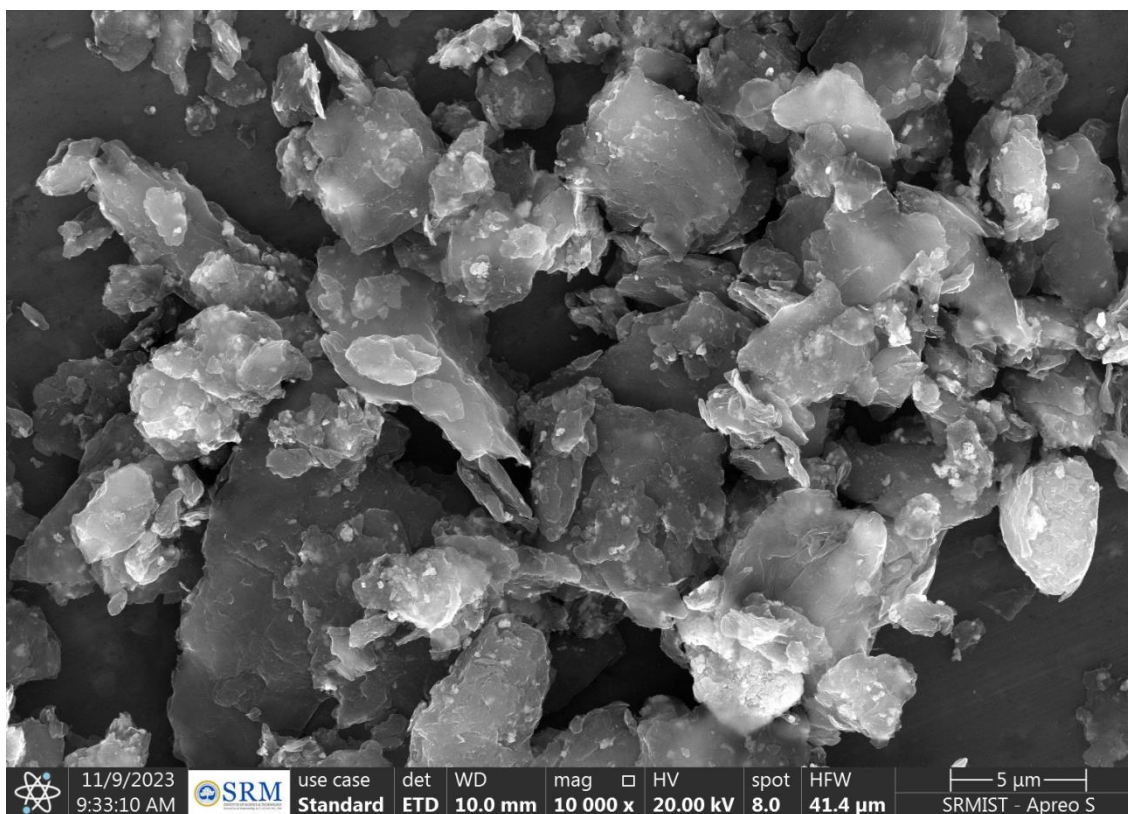

Figure S5. SEM image of Pd-Cu@rGO nanocomposite.

VIII. SEM image of recoverd Pd-Cu@rGO:

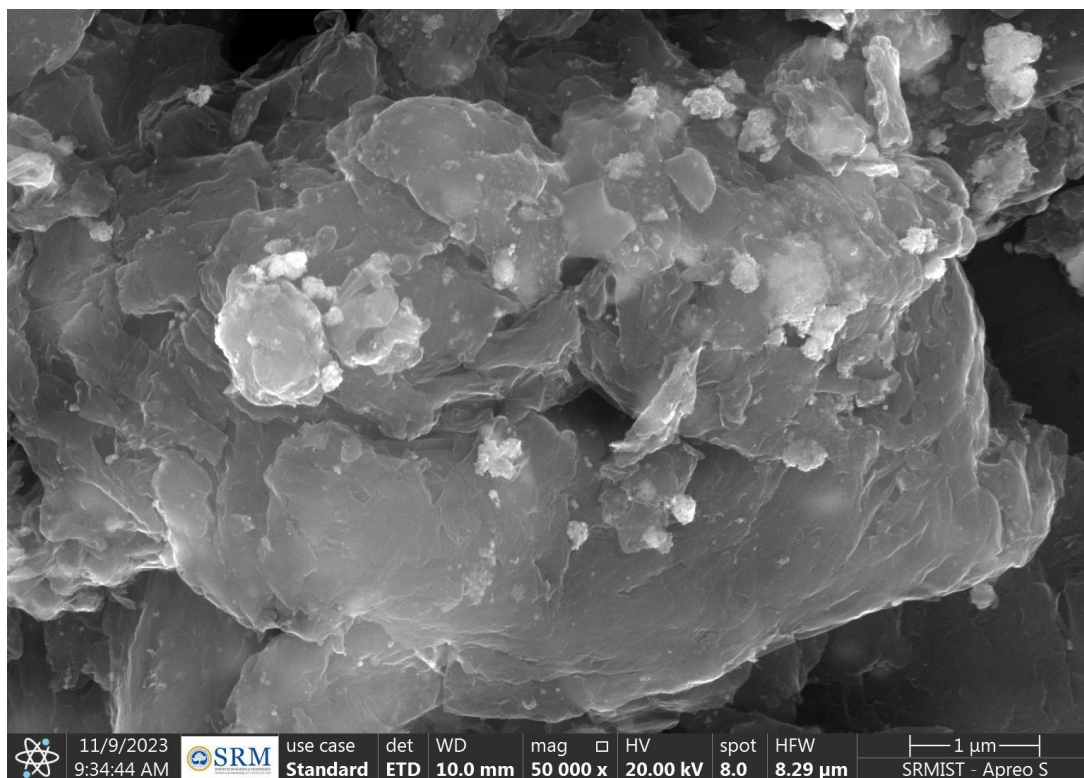

Figure S6(a). SEM image of recovered Pd-Cu@rGO nanocomposite (after 5 cycles).

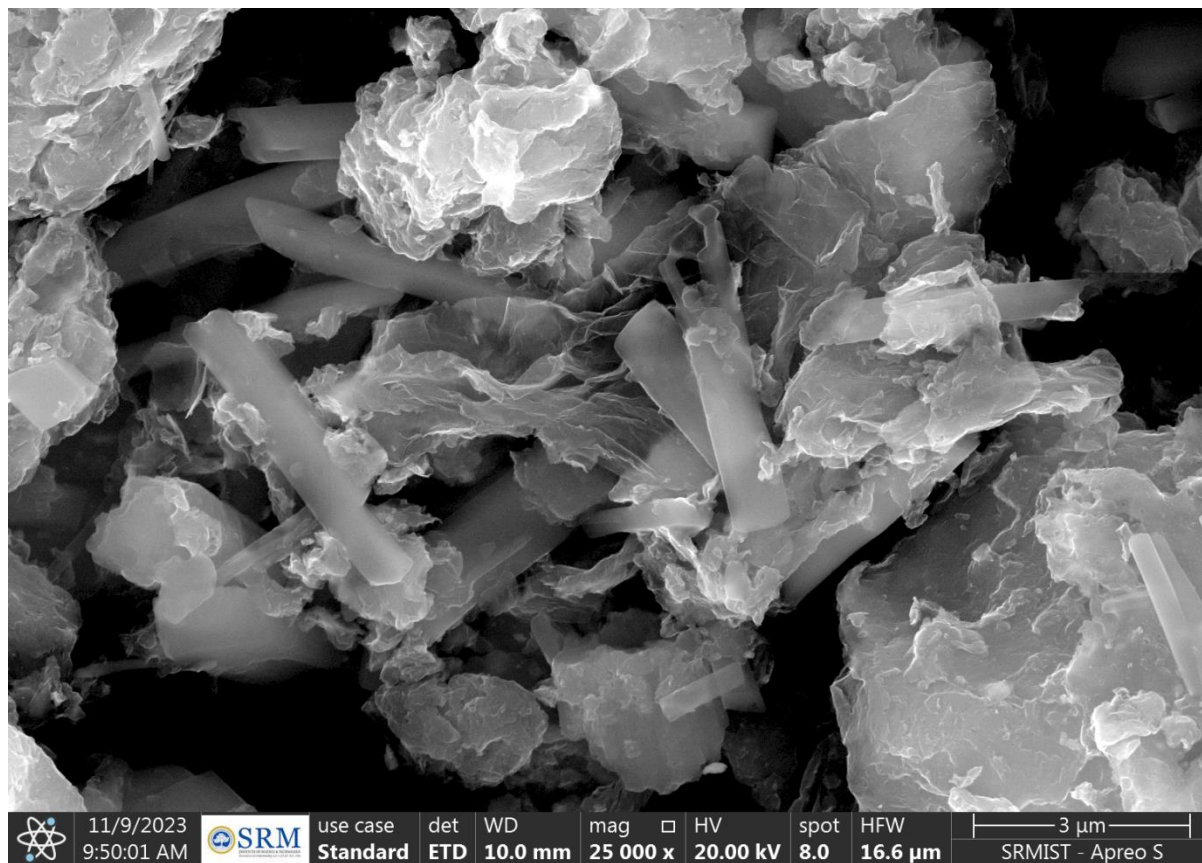

Figure S6(b). SEM image of recovered Pd-Cu@rGO nanocomposite (after 7 cycles).

### IX. EDS Spectrum and EDS mapping of recovered Pd-Cu@rGO:

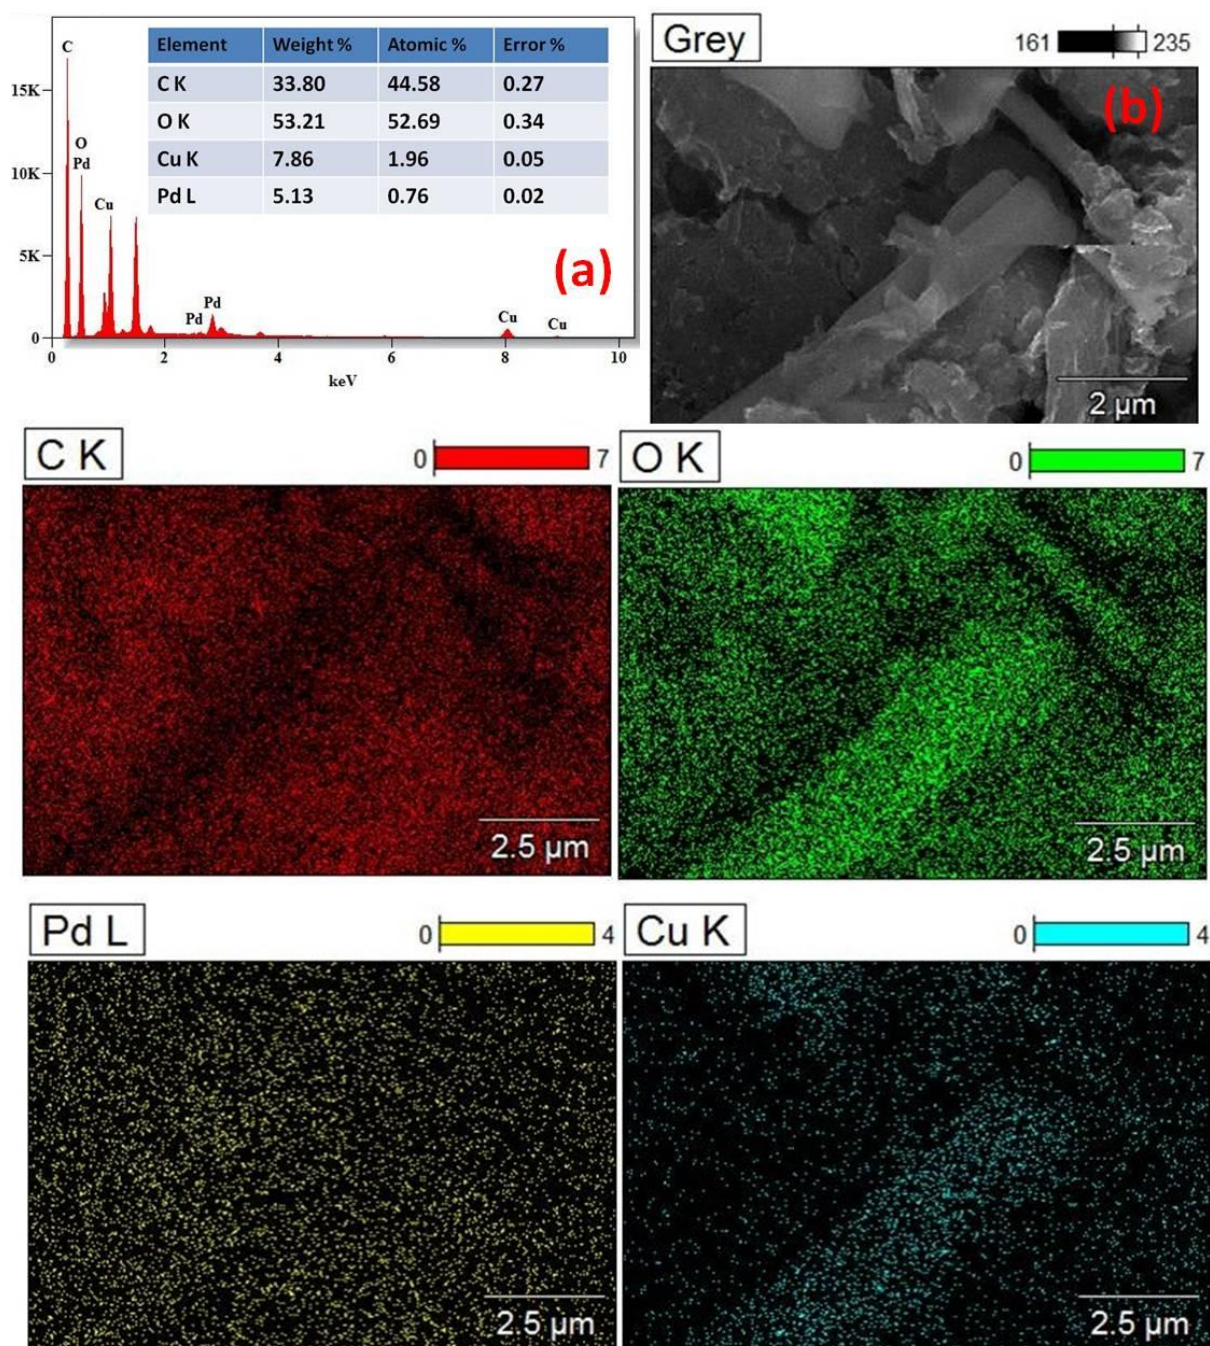

**Figure S7.** (a) EDS spectrum and (b) SEM micrograph and corresponding EDS mapping of recovered Pd-Cu@rGO(after 7 cycles) showing C (K), O (K), Pd (L) and Cu (K) images.

X. CV:

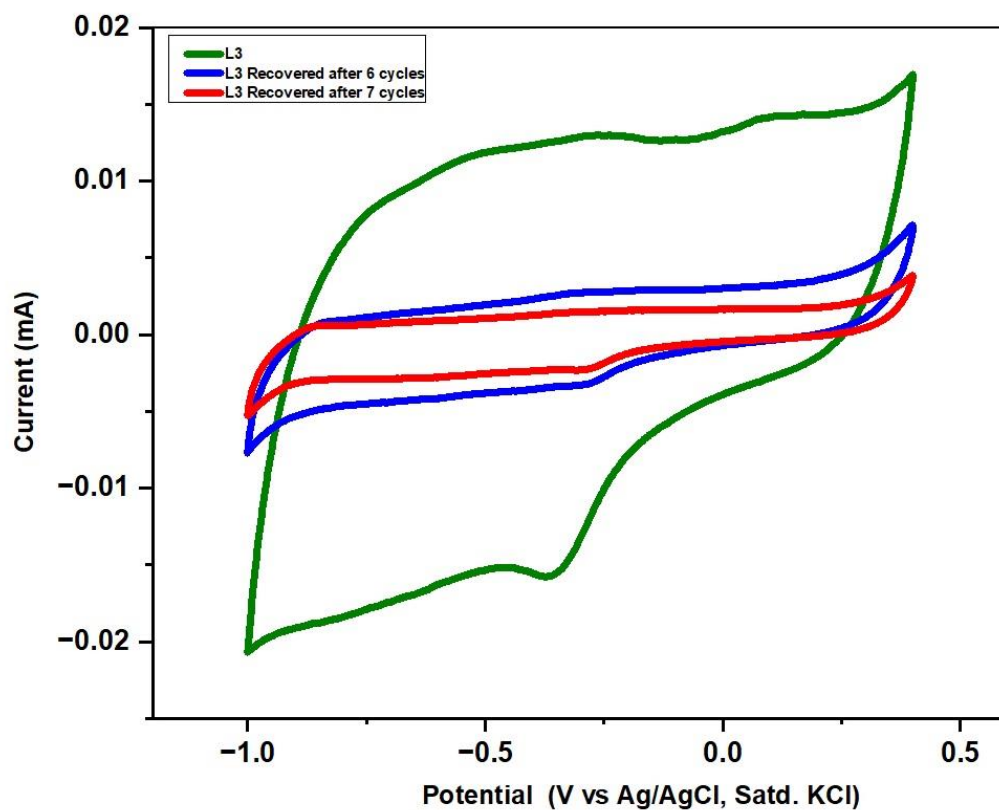

**Figure S8.** Cyclic voltammograms of (a) fresh 10wt% Pd- 10 wt% Cu@rGO (**L3**) and (b) recovered 10wt% Pd- 10 wt% Cu@rGO after 6 consecutive cycles of SM reaction samples (**L3 recovered after 6cycles**) (c) recovered 10wt% Pd- 10 wt% Cu@rGO after 7 consecutive cycles of SM reaction samples (**L3 recovered after 7cycles**) recorded in Nitrogen-saturated 1 M KOH electrolyte with a scan rate of 50 mV/s in a potential range of -1.0 to 0.4 V vs Ag/AgCl (satd. KCl).

## XI. Preparation of *N*-protected Carbazoles (3a-c)

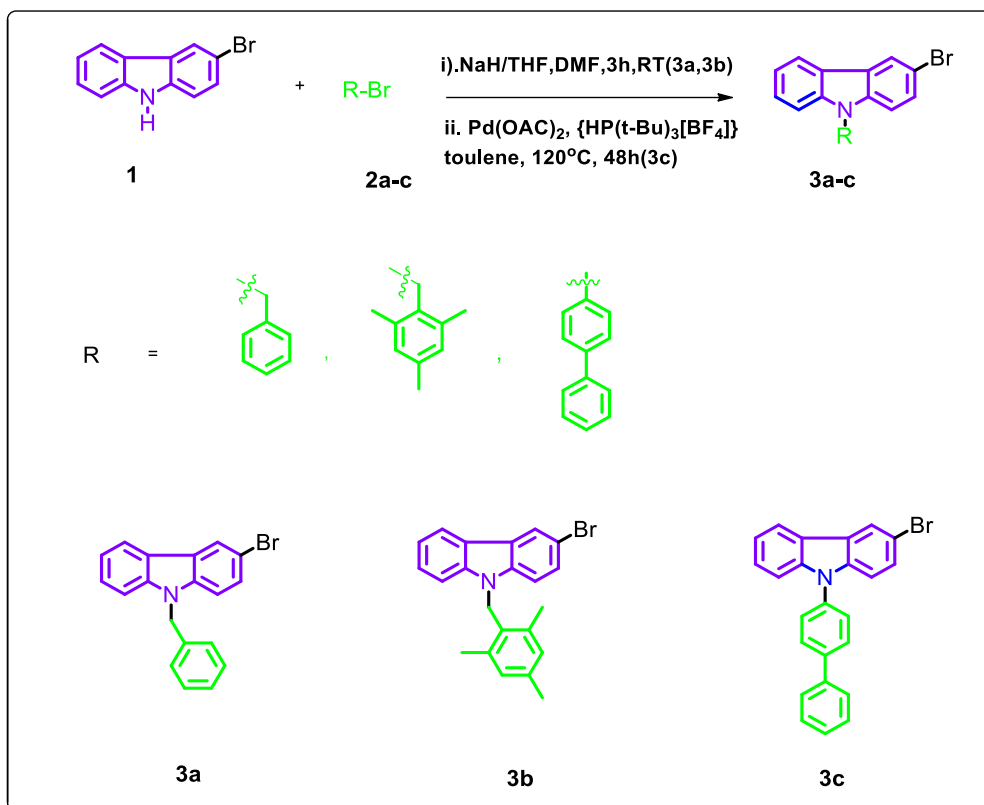

### a) Preparation of *N*-benzyl/2',4',6'-trimethyl benzyl-carbazoles (3a& 3b)<sup>12,13a-c</sup>

In a dried 25 mL round-bottomed flask, DMF (5 mL) and NaH (2.5 eq) were taken and the resulting solution was added to the solution of 3-bromocarbazole (1 eq) in THF (10mL) at 0 °C. After stirring for 30 minutes at room temperature, benzyl bromide(1eq) was added to the solution and the reaction was continued overnight at room temperature, the solution was quenched with ice-water (20 mL), extracted with EtOAc (30 mL X 3). After washing the combined organic layers with water (2 mL X 5) and brine, the organic phase was dried with anhydrous Na<sub>2</sub>SO<sub>4</sub>. After that, the organic phase is concentrated, and the solvent is evaporated under rotovapor to get the pure compound **3a**. A similar procedure was adopted to compound **3b**.

### b) Preparation of *N*-biphenyl-3-bromo-carbazoles (3c)<sup>12</sup>

A mixture of NaO<sup>t</sup>Bu (2.8 g, 29.1 mmol), Pd(OAc)<sub>2</sub> (0.2 mmol), and [HP<sup>t</sup>-Bu]<sub>3</sub>{BF<sub>4</sub>} (0.2 mmol) was dissolved in toluene (10 mL) in a 25 mL oven-dried flask. 3-bromocarbazole (1 mmol) and biphenyl bromide (1 mmol) were added. The reaction was heated at reflux temperature for

48 h. Then, the reaction mixture was cooled to room temperature, the mixture was quenched by addition of 2 M HCl (aq) (25 mL). The mixture was extracted with dichloromethane (25 mL X 3), dried over anhydrous Na<sub>2</sub>SO<sub>4</sub>, filtered, and the solvent was removed under reduced pressure. Finally, the product was isolated by column chromatography using 20: 80 ethyl acetate: hexane as eluents to produce product **3c**.

## XII. Characterization Data

### 3a. 9-Benzyl-3-bromo-9H-carbazole<sup>14</sup>

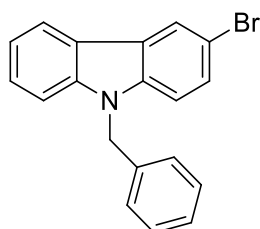

Colourless solid; M.P. 196-198°C. Yield: 98%; <sup>1</sup>H NMR (400MHz, CDCl<sub>3</sub>): δ (ppm): 8.23 (d, *J* = 1.6 Hz, 1H, Ar-H), 8.08 (d, *J* = 7.6Hz, 1H, Ar-H), 7.50-7.43 (m, 2H, Ar-H), 7.37 (d, *J* = 8.4Hz, 1H, Ar-H), 7.26-7.21 (m, 5H, Ar-H), 7.11-7.09 (m, 2H, Ar-H), 5.49 (s, 2H, Ar-CH<sub>2</sub>). <sup>13</sup>C NMR (100MHz, CDCl<sub>3</sub>): δ (ppm): 140.99 (Ar-C), 139.29 (Ar-C), 136.72 (Ar-C), 128.89 (Ar-C), 128.53 (Ar-C), 127.66 (Ar-C), 126.65 (Ar-C), 126.35 (Ar-C), 124.81 (Ar-C), 123.18 (Ar-C), 122.03 (Ar-C), 120.64 (Ar-C), 119.70 (Ar-C), 112.10 (Ar-C), 110.45 (Ar-C), 109.18 (Ar-C), 46.68 (Ar-CH<sub>2</sub>). Anal. calcd. for C<sub>19</sub>H<sub>14</sub>N<sup>+</sup> [M]<sup>+</sup>: C, 67.87; H, 4.20; N, 4.17%; Found: C, 67.84; H, 4.22; N, 4.20 %.

### 3b. 3-Bromo-9-(2,4,6-trimethylbenzyl)-9H-carbazole

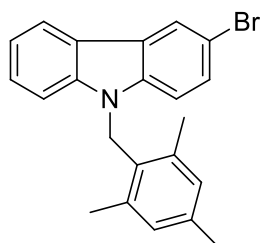

Colourless solid; M.P. 144-146°C. Yield: 98%; <sup>1</sup>H NMR (400MHz, CDCl<sub>3</sub>): δ (ppm): 8.16 (d, *J* = 2Hz, 1H, Ar-H), 8.02 (d, *J* = 7.6Hz, 1H, Ar-H), 7.38-7.34 (m, 2H, Ar-H), 7.23-7.15 (m, 3H, Ar-H), 6.93-6.87 (m, 2H, Ar-H), 5.38 (s, 2H, Ar-CH<sub>2</sub>-), 2.28 (s, 3H, Ar-CH<sub>3</sub>), 2.12 (s, 6H, Ar-[CH<sub>3</sub>]<sub>2</sub>). <sup>13</sup>C NMR (100MHz, CDCl<sub>3</sub>): δ (ppm): 141.08 (Ar-C), 139.32 (Ar-C), 137.76 (Ar-C), 137.54 (Ar-C),

129.82 (Ar-C), 129.07 (Ar-C), 128.30 (Ar-C), 126.42 (Ar-C), 124.86 (Ar-C), 122.91 (Ar-C), 122.00 (Ar-C), 120.41 (Ar-C), 119.36 (Ar-C), 117.78 (Ar-C), 110.95 (Ar-C), 109.61 (Ar-C), 43.26 (Ar-CH<sub>2</sub>), 21.01 (Ar-CH<sub>3</sub>), 20.42 (Ar-CH<sub>3</sub>). Anal. calcd. for C<sub>22</sub>H<sub>20</sub>N<sup>+</sup> [M]<sup>+</sup>: C, 69.85; H, 5.33; N, 3.70%; Found: C, 69.82; H, 5.36; N, 3.67%.

### 3c. 9-([1,1'-Biphenyl]-4-yl)-3-bromo-9H-carbazole

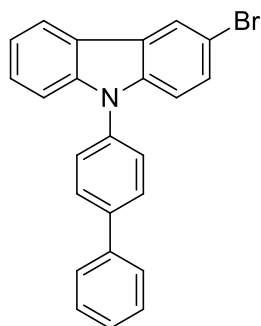

Colourless solid; M.P. 154-156°C. Yield: 97%; <sup>1</sup>H NMR (400MHz, CDCl<sub>3</sub>): δ (ppm): 8.26 (d, *J* = 1.6Hz, 1H, Ar-H), 8.10-8.08 (m, 1H, Ar-H), 7.82-7.80 (m, 2H, Ar-H), 7.69-7.67 (m, 2H, Ar-H), 7.60-7.58 (m, 2H, Ar-H), 7.52-7.48 (m, 3H, Ar-H), 7.45-7.41 (m, 3H, Ar-H), 7.34-7.28 (m, 2H, Ar-H). <sup>13</sup>C NMR (100MHz, CDCl<sub>3</sub>): δ (ppm): 141.22 (Ar-C), 140.70 (Ar-C), 140.16 (Ar-C), 139.56 (Ar-C), 129.03 (Ar-C), 128.66 (Ar-C), 127.79 (Ar-C), 127.29 (Ar-C), 127.18 (Ar-C), 126.75 (Ar-C), 125.20 (Ar-C), 123.10 (Ar-C), 122.37 (Ar-C), 120.55 (Ar-C), 120.42 (Ar-C), 112.77 (Ar-C), 111.38 (Ar-C), 110.12 (Ar-C). Anal. calcd. for C<sub>24</sub>H<sub>16</sub>N<sup>+</sup> [M]<sup>+</sup>: C, 72.37; H, 4.05; N, 3.52%; Found: C, 72.35; H, 4.03; N, 3.54 %.

### 5a. 9-([1,1'-Biphenyl]-4-yl)-3-phenyl-9H-carbazole

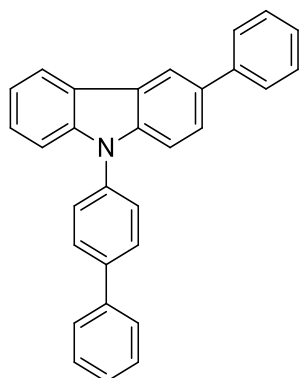

Colourless solid; M.P. 120-122°C. Yield: 90%; <sup>1</sup>H NMR (400MHz, CDCl<sub>3</sub>): δ (ppm): 8.35 (s, 1H, Ar-H), 8.19 (d, *J* = 6Hz, 1H, Ar-H), 7.79 (d, *J* = 6.8Hz, 2H, Ar-H), 7.71 (d, *J* = 6.4Hz, 2H, Ar-H),

7.67-7.60 (m, 5H, Ar-H), 7.50-7.28 (m, 10H, Ar-H).  $^{13}\text{C}$  NMR (100MHz,  $\text{CDCl}_3$ ):  $\delta$  (ppm): 142.06 (Ar-C), 141.38 (Ar-C), 140.41 (Ar-C), 140.31 (Ar-C), 136.88 (Ar-C), 133.65 (Ar-C), 129.06 (Ar-C), 128.88 (Ar-C), 128.61 (Ar-C), 127.75 (Ar-C), 127.43 (Ar-C), 127.31 (Ar-C), 127.22 (Ar-C), 126.67 (Ar-C), 126.27 (Ar-C), 125.62 (Ar-C), 124.06 (Ar-C), 123.66 (Ar-C), 120.49 (Ar-C), 120.25 (Ar-C), 118.93 (Ar-C), 110.18 (Ar-C), 110.09 (Ar-C). Anal. calcd. for  $\text{C}_{30}\text{H}_{21}\text{N}^+$   $[\text{M}]^+$ : C, 91.11; H, 5.35; N, 3.54%; Found: C, 91.13; H, 5.33; N, 3.51 %.

**5b. 9-([1,1'-Biphenyl]-4-yl)-3-(p-tolyl)-9H-Carbazole.**

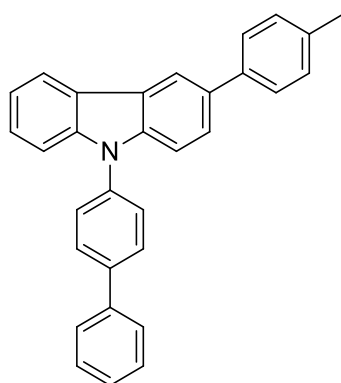

Colourless solid; M.P.150-151°C. Yield: 98%;  $^1\text{H}$  NMR (400MHz,  $\text{CDCl}_3$ ):  $\delta$  (ppm): 8.34 (d,  $J = 1.2\text{Hz}$ , 1H, Ar-H), 8.20 (d,  $J = 7.6\text{Hz}$ , 1H, Ar-H), 7.83 -7.81 (m, 2H, Ar-H), 7.70-7.61 (m, 7H, Ar-H), 7.52-7.39 (m, 6H, Ar-H), 7.33-7.28 (m, 3H, Ar-H), 2.42 (s, 3H, Ar- $\text{CH}_3$ ).  $^{13}\text{C}$  NMR (100MHz,  $\text{CDCl}_3$ ):  $\delta$  (ppm): 145.01 (Ar-C), 140.35 (Ar-C), 140.30 (Ar-C), 140.21 (Ar-C), 136.88 (Ar-C), 136.31 (Ar-C), 135.56 (Ar-C), 129.56 (Ar-C), 129.01 (Ar-C), 128.58 (Ar-C), 127.70 (Ar-C), 127.28 (Ar-C), 127.21 (Ar-C), 127.20 (Ar-C), 126.16 (Ar-C), 125.45 (Ar-C), 123.97 (Ar-C), 123.61 (Ar-C), 120.52 (Ar-C), 120.43 (Ar-C), 120.13 (Ar-C), 118.64 (Ar-C), 110.08 (Ar-C), 110.01 (Ar-C), 21.16 (Ar- $\text{CH}_3$ ). HRMS(EI+): Calcd for  $\text{C}_{31}\text{H}_{23}\text{N}^+(\text{M})^+$ : 410.52, Found: 410.1903

**5c. 9-([1,1'-Biphenyl]-4-yl)-3-(4-methoxyphenyl)-9H-Carbazole.**

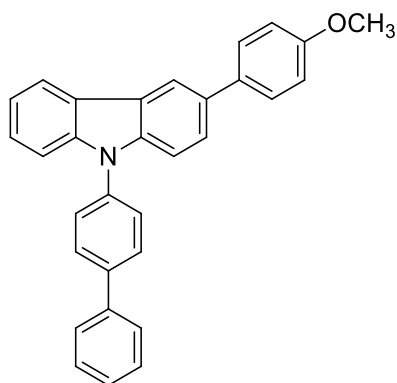



Colourless solid; M.P. 136-138<sup>o</sup>C. Yield: 97%; <sup>1</sup>H NMR (400MHz, CDCl<sub>3</sub>): δ (ppm): 8.22 (d, *J* = 1.2Hz, 1H, Ar-H), 8.11 (d, *J* = 7.6Hz, 1H, Ar-H), 7.73 (d, *J* = 8.4Hz, 2H, Ar-H), 7.61-7.51 (m, 8H, Ar-H), 7.43-7.32 (m, 6H, Ar-H), 7.24 (t, *J* = 7.6 & 7.2 Hz, 1H, Ar-H), 6.92 (d, *J* = 8.8Hz, 1H, Ar-H), 3.78 (s, 3H, Ar-OCH<sub>3</sub>). <sup>13</sup>C NMR (100MHz, CDCl<sub>3</sub>): δ (ppm): 158.73 (Ar-C), 141.32 (Ar-C), 140.33 (Ar-C), 140.30 (Ar-C), 140.04 (Ar-C), 136.91 (Ar-C), 134.67 (Ar-C), 133.32 (Ar-C), 129.01 (Ar-C), 128.57 (Ar-C), 128.35 (Ar-C), 127.70 (Ar-C), 127.27 (Ar-C), 127.18 (Ar-C), 126.15 (Ar-C), 125.31 (Ar-C), 123.99 (Ar-C), 123.61 (Ar-C), 120.42 (Ar-C), 120.11 (Ar-C), 118.40 (Ar-C), 114.30 (Ar-C), 110.09 (Ar-C), 110.01 (Ar-C), 55.44 (Ar-OCH<sub>3</sub>). Anal. calcd. for C<sub>31</sub>H<sub>23</sub>N<sup>+</sup> [M]<sup>+</sup>: C, 87.50; H, 5.45; N, 3.29%; Found: C, 87.52; H, 5.43; N, 3.31 %.

**5d. 9-[(1,1'-Biphenyl)-4-yl]-3-(4-chlorophenyl)-9H-Carbazole.**

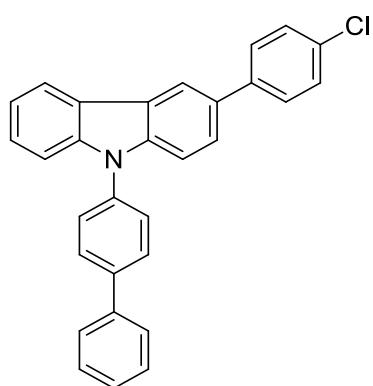

Colourless solid; M.P. 144-146<sup>o</sup>C. Yield: 85%; <sup>1</sup>H NMR (400MHz, CDCl<sub>3</sub>): δ (ppm): 8.31 (s, 1H, Ar-H), 8.19 (d, *J* = 6.8Hz, 1H, Ar-H), 7.82 (d, *J* = 7.6Hz, 2H, Ar-H), 7.69-7.62 (m, 6H, Ar-H), 7.50-7.42 (m, 8H, Ar-H), 7.33-7.23 (m, 2H, Ar-H). <sup>13</sup>C NMR (100MHz, CDCl<sub>3</sub>): δ (ppm): 141.39 (Ar-C), 140.49 (Ar-C), 140.24 (Ar-C), 136.72 (Ar-C), 132.65 (Ar-C), 132.28 (Ar-C), 129.02 (Ar-C), 128.93 (Ar-C), 128.61 (Ar-C), 128.55 (Ar-C), 127.75 (Ar-C), 127.28 (Ar-C), 127.18 (Ar-C), 126.36 (Ar-C), 125.30 (Ar-C), 124.05 (Ar-C), 123.46 (Ar-C), 120.44 (Ar-C), 120.29 (Ar-C), 118.74 (Ar-C), 110.25 (Ar-C), 110.10 (Ar-C). Anal. calcd. for C<sub>30</sub>H<sub>20</sub>N<sup>+</sup> [M]<sup>+</sup>: C, 83.81; H, 4.69; N, 3.26%; Found: C, 83.79; H, 4.71; N, 3.24 %.

**5e. 9-[(1,1'-Biphenyl)-4-yl]-3-(4-[trifluoromethyl]-phenyl)-9H-Carbazole**

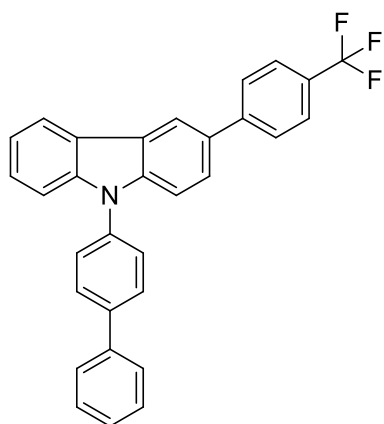

Colourless solid; M.P. 165-167<sup>0</sup>C. Yield: 91%; <sup>1</sup>H NMR (400MHz, CDCl<sub>3</sub>): δ (ppm): 8.36 (d, *J* = 1.2 Hz, 1H, Ar-H), 8.21 (d, *J* = 7.6Hz, 1H, Ar-H), 7.83-7.80 (m, 4H, Ar-H), 7.72-7.62 (m, 7H, Ar-H), 7.54-7.39 (m, 6H, Ar-H), 7.35-7.31 (m, 1H, Ar-H). <sup>13</sup>C NMR (100MHz, CDCl<sub>3</sub>): δ (ppm): 145.00 (Ar-C), 141.46 (Ar-C), 140.82 (Ar-C), 140.61 (Ar-C), 140.21 (Ar-C), 136.62 (Ar-C), 131.94 (Ar-C), 129.04 (Ar-C), 128.64 (Ar-C), 127.78 (Ar-C), 127.48 (Ar-C), 127.30 (Ar-C), 127.19 (Ar-C), 126.49 (Ar-C), 125.77 (Ar-C), 125.74 (Ar-C), 125.46 (Ar-C), 124.12 (Ar-C), 123.41 (Ar-C), 123.17 (Ar-C), 120.47 (Ar-C), 120.41 (Ar-C), 119.12 (Ar-C), 110.37 (Ar-C), 110.17 (Ar-C). Anal. calcd. for C<sub>31</sub>H<sub>20</sub>N<sup>+</sup> [M]<sup>+</sup>: C, 80.33; H, 4.35; N, 3.02%; Found: C, 80.35; H, 4.37; N, 3.04 %.

#### 5f. 9-([1,1'-Biphenyl]-4-yl)-3-(2-nitrophenyl)-9H-Carbazole

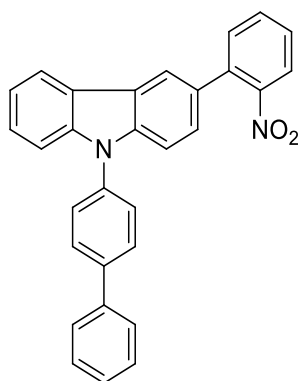

Yellow Colour solid; M.P. 152-153<sup>0</sup>C. Yield: 81%; <sup>1</sup>H NMR (400MHz, CDCl<sub>3</sub>): δ (ppm): 8.58 (t, *J* = 2, & 2Hz, 1H, Ar-H), 8.39 (d, *J* = 1.6Hz, 1H, Ar-H), 8.23-8.16 (m, 2H, Ar-H), 8.04 (d, *J* = 8Hz, 1H, Ar-H), 7.85 (d, *J* = 8.4Hz, 2H, Ar-H), 7.71-7.60 (m, 6H, Ar-H), 7.56-7.40 (m, 6H, Ar-H). 7.36-7.33 (m, 1H, Ar-H). <sup>13</sup>C NMR (100MHz, CDCl<sub>3</sub>): δ (ppm): 148.85 (Ar-C), 143.67 (Ar-C), 141.50 (Ar-C), 140.94 (Ar-C), 140.68 (Ar-C), 140.18 (Ar-C), 136.52 (Ar-C), 133.15 (Ar-C), 130.79 (Ar-C), 129.69 (Ar-C), 129.04 (Ar-C), 128.67 (Ar-C), 127.80 (Ar-C), 127.30 (Ar-C), 127.19 (Ar-C), 126.62 (Ar-C), 125.24 (Ar-C), 124.23 (Ar-C), 123.30 (Ar-C), 121.95 (Ar-C), 121.29 (Ar-C), 120.52 (Ar-C),

119.07 (Ar-C), 110.53(Ar-C), 110.21 (Ar-C). Anal. calcd. for  $C_{30}H_{20}N_2^+ [M]^+$ : C, 81.80; H, 4.58; N, 7.26%; Found: C, 81.78; H, 4.60; N, 7.24 %.

**5g. 9-([1,1'-Biphenyl]-4-yl)-3-(naphthalen-2-yl)-9H-Carbazole**

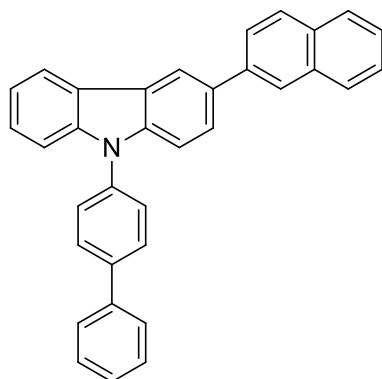

Colourless solid; M.P. 146-148<sup>o</sup>C. Yield: 90%; <sup>1</sup>H NMR (400MHz, CDCl<sub>3</sub>): δ (ppm): 8.19 (s, 1H, Ar-H), 8.08 (d, *J* = 7.6Hz, 1H, Ar-H), 7.96 (d, *J* = 8.4Hz, 1H, Ar-H), 7.87-7.76 (m, 4H, Ar-H), 7.64 (d, *J* = 8Hz, 3H, Ar-H), 7.50-7.33 (m, 12H, Ar-H), 7.25 (t, *J* = 7.2, &7.2 Hz, 1H, Ar-H). <sup>13</sup>C NMR (100MHz, CDCl<sub>3</sub>): δ (ppm): 141.33 (Ar-C), 140.93 (Ar-C), 140.44 (Ar-C), 140.30 (Ar-C), 140.22 (Ar-C), 136.90 (Ar-C), 133.93 (Ar-C), 132.72 (Ar-C), 132.23 (Ar-C), 129.01 (Ar-C), 128.62 (Ar-C), 128.29 (Ar-C), 127.71 (Ar-C), 127.39 (Ar-C), 127.35 (Ar-C), 127.20 (Ar-C), 126.40 (Ar-C), 126.21 (Ar-C), 125.98 (Ar-C), 125.73 (Ar-C), 125.47 (Ar-C), 123.52 (Ar-C), 123.48 (Ar-C), 121.77 (Ar-C), 120.46 (Ar-C), 120.19 (Ar-C), 110.03 (Ar-C), 109.58 (Ar-C). Anal. calcd. for  $C_{34}H_{23}N^+ [M]^+$ : C, 91.65; H, 5.20; N, 3.14%; Found: C, 91.67; H, 5.22; N,3.13 %.

**5h. 3,9-Di([1,1'-biphenyl]-4-yl)-9H-Carbazole.**

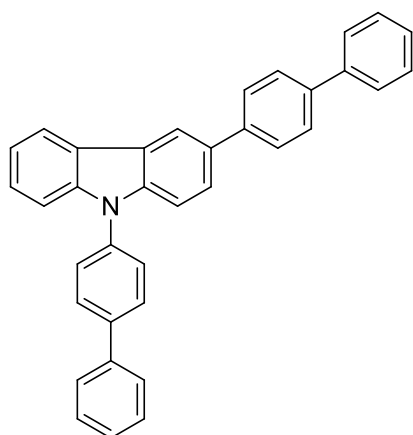

Colourless solid; M.P 150-152<sup>o</sup>C. Yield: 86%; <sup>1</sup>HNMR (400MHz, CDCl<sub>3</sub>): δ (ppm): 8.41 (d, *J* = 1.6Hz, 1H, Ar-H), 8.22 (d, *J* = 8Hz, 1H, Ar-H), 7.84- 7.79 (m, 4H, Ar-H), 7.72- 7.64 (m, 9H, Ar-H),

7.55-7.30 (m, 10H, Ar-H).  $^{13}\text{C}$  NMR (100MHz,  $\text{CDCl}_3$ ):  $\delta$  (ppm): 141.37 (Ar-C), 140.94 (Ar-C), 140.90 (Ar-C), 140.44 (Ar-C), 140.28 (Ar-C), 139.45 (Ar-C), 136.82 (Ar-C), 133.02 (Ar-C), 129.01 (Ar-C), 128.85 (Ar-C), 128.60 (Ar-C), 127.71 (Ar-C), 127.66 (Ar-C), 127.57 (Ar-C), 127.30 (Ar-C), 127.19 (Ar-C), 127.07 (Ar-C), 126.25 (Ar-C), 125.44 (Ar-C), 124.06 (Ar-C), 123.59 (Ar-C), 120.45 (Ar-C), 120.22 (Ar-C), 118.76 (Ar-C), 110.20 (Ar-C), 110.06 (Ar-C). Anal. calcd. for  $\text{C}_{36}\text{H}_{25}\text{N}^+ [\text{M}]^+$ : C, 91.69; H, 5.34; N, 2.97%; Found: C, 91.67; H, 5.36; N, 2.99 %.

### 5i. 9-([1,1'-Biphenyl]-4-yl)-3-(thiophen-2-yl)-9H-Carbazole

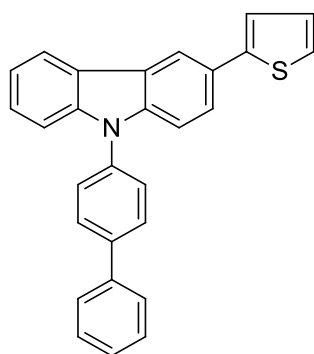

Yellow colour solid; M.P. 104-105°C. Yield: 91%;  $^1\text{H}$  NMR (400MHz,  $\text{CDCl}_3$ ):  $\delta$  (ppm): 8.48 (d,  $J = 1.2\text{Hz}$ , 1H, Ar-H), 8.27 (d,  $J = 7.6\text{Hz}$ , 1H, Ar-H), 7.87-7.80 (m, 4H, Ar-H), 7.73-7.69 (m, 4H, Ar-H), 7.60-7.42 (m, 8H, Ar-H), 7.36 -7.32(t,  $J = 7.6$ , & 6.8 Hz, 1H, Ar-H).  $^{13}\text{C}$  NMR (100MHz,  $\text{CDCl}_3$ ):  $\delta$  (ppm): 143.16 (Ar-C), 141.34 (Ar-C), 140.39 (Ar-C), 140.28 (Ar-C), 140.19 (Ar-C), 136.82 (Ar-C), 129.03 (Ar-C), 128.58 (Ar-C), 128.44 (Ar-C), 127.73 (Ar-C), 127.27 (Ar-C), 127.20 (Ar-C), 126.79 (Ar-C), 126.26 (Ar-C), 126.15 (Ar-C), 125.03 (Ar-C), 123.92 (Ar-C), 123.55 (Ar-C), 120.45 (Ar-C), 120.20 (Ar-C), 119.18 (Ar-C), 118.18 (Ar-C), 110.15 (Ar-C), 110.07 (Ar-C). Anal. calcd. for  $\text{C}_{28}\text{H}_{19}\text{N}^+ [\text{M}]^+$ : C, 83.76; H, 4.77; N, 3.49%; Found: C, 83.74; H, 4.79; N, 3.47 %.

### 5j. 9-([1,1'-Biphenyl]-4-yl)-3-(pyridin-3-yl)-9H-Carbazole

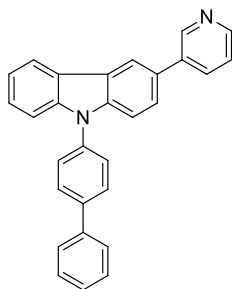

Yellow colour solid; M.P. 132-134°C. Yield: 70%; <sup>1</sup>H NMR (400MHz, CDCl<sub>3</sub>): δ(ppm): 8.48 (d, *J* = 1.2Hz, 1H, Ar-H), 8.27 (d, *J* = 7.6Hz, 1H, Ar-H), 7.87-7.80 (m, 4H, Ar-H), 7.73-7.69 (m, 5H, Ar-H), 7.60-7.42 (m, 8H, Ar-H), 7.36 (t, *J* = 7.6, & 6.8 Hz, 1H, Ar-H). Anal. calcd. for C<sub>29</sub>H<sub>20</sub>N<sub>2</sub><sup>+</sup> [M]<sup>+</sup>: C, 87.85; H, 5.08; N, 7.07%; Found: C, 87.87; H, 5.06 ; N, 7.04 %

#### 5k. 9-Benzyl-3-(*p*-tolyl)-9H-Carbazole

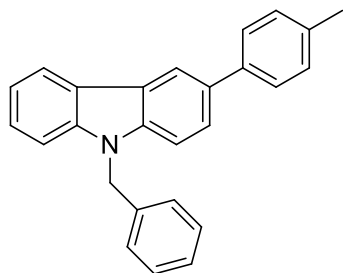

Colourless solid; M.P. 105-107°C. Yield: 97%; <sup>1</sup>H NMR (400MHz, CDCl<sub>3</sub>): δ (ppm): 8.31 (d, *J* = 1.6Hz, 1H, Ar-H), 8.17 (d, *J* = 8Hz, 1H, Ar-H), 7.66 (d(d), *J* = 2, & 2Hz, 1H, Ar-H), 7.60 (d, *J* = 8Hz, 2H, Ar-H), 7.45-7.35 (m, 3H, Ar-H), 7.28-7.24 (m, 6H, Ar-H), 7.17-7.15 (m, 2H, Ar-H), 5.52 (s, 2H, Ar-CH<sub>2</sub>-), 2.41 (s, 3H, Ar-CH<sub>3</sub>). <sup>13</sup>C NMR (100MHz, CDCl<sub>3</sub>): δ (ppm): 141.15 (Ar-C), 140.07 (Ar-C), 139.24 (Ar-C), 137.18 (Ar-C), 136.16 (Ar-C), 132.80 (Ar-C), 129.54 (Ar-C), 128.85 (Ar-C), 127.54 (Ar-C), 127.19 (Ar-C), 126.47 (Ar-C), 126.04 (Ar-C), 125.36 (Ar-C), 123.57 (Ar-C), 123.24 (Ar-C), 120.50 (Ar-C), 119.36 (Ar-C), 118.74 (Ar-C), 109.12 (Ar-C), 109.08 (Ar-C), 46.72 (Ar-CH<sub>2</sub>-), 21.14 (Ar-CH<sub>3</sub>). HRMS(EI<sup>+</sup>): Calcd for C<sub>26</sub>H<sub>21</sub>N [M]<sup>+</sup>: 348.45, Found: 348.1726

#### 5l. 9-Benzyl-3-(4-methoxyphenyl)-9H-Carbazole.

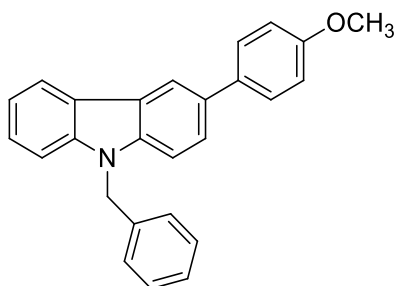

Colourless solid; M.P. 127-129°C. Yield: 96%; <sup>1</sup>H NMR (400MHz, CDCl<sub>3</sub>): δ (ppm): 8.28 (d, *J* = 1.2Hz, 1H, Ar-H), 8.17 (d, *J* = 6.4Hz, 1H, Ar-H), 7.63-7.60 (m, 3H, Ar-H), 7.44-7.35 (m, 4H, Ar-H), 7.27-7.22 (m, 4H, Ar-H), 7.16 (d, *J* = 5.6Hz, 1H, Ar-H), 7.01 (d, *J* = 7.2Hz, 2H, Ar-H), 5.51(s, 2H, Ar-CH<sub>2</sub>-), 3.86 (s, 3H, Ar-OCH<sub>3</sub>). <sup>13</sup>C NMR(100MHz, CDCl<sub>3</sub>): δ (ppm): 158.64 (Ar-C), 141.14 (Ar-C), 139.88 (Ar-C), 137.18 (Ar-C), 134.77 (Ar-C), 132.53 (Ar-C), 128.84 (Ar-C), 128.31 (Ar-C), 127.52 (Ar-C), 126.46 (Ar-C), 126.03 (Ar-C), 125.21 (Ar-C), 123.57 (Ar-C), 123.20 (Ar-C), 120.48

(Ar-C), 119.32 (Ar-C), 118.50 (Ar-C), 114.27 (Ar-C), 109.12 (Ar-C), 109.07 (Ar-C), 55.42 (Ar-CH<sub>2</sub>), 46.70 (Ar-OCH<sub>3</sub>). Anal. calcd. for C<sub>26</sub>H<sub>21</sub>N<sup>+</sup> [M]<sup>+</sup>: C, 85.92; H, 5.82; N, 3.85%; Found: C, 85.94; H, 5.84; N, 3.87 %

**5m. 9-([1,1'-Biphenyl]-4-yl)-3-(4-chlorophenyl)-9H-Carbazole.**

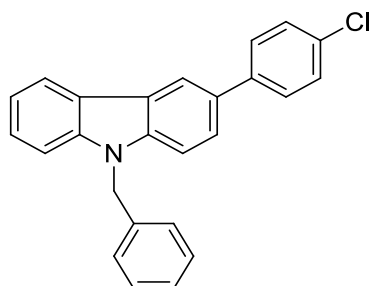

Colourless solid; M.P. 144-146°C. Yield: 91%; <sup>1</sup>H NMR (400MHz, CDCl<sub>3</sub>): δ (ppm): 8.31 (s, 1H, Ar-H), 8.20 (d, *J* = 6.8Hz, 1H, Ar-H), 7.83 (d, *J* = 7.6Hz, 2H, Ar-H), 7.70-7.60 (m, 6H, Ar-H), 7.50-7.43 (m, 8H, Ar-H), 7.34 (d, *J* = 6.8Hz, 3H, Ar-H). <sup>13</sup>C NMR (100MHz, CDCl<sub>3</sub>): δ (ppm): 141.39 (Ar-C), 140.49 (Ar-C), 140.24 (Ar-C), 136.73 (Ar-C), 132.65 (Ar-C), 132.28 (Ar-C), 129.03 (Ar-C), 128.94 (Ar-C), 128.62 (Ar-C), 128.56 (Ar-C), 127.75 (Ar-C), 127.29 (Ar-C), 127.19 (Ar-C), 126.37 (Ar-C), 125.30 (Ar-C), 124.06 (Ar-C), 123.47 (Ar-C), 120.45 (Ar-C), 120.29 (Ar-C), 118.75 (Ar-C), 110.25 (Ar-C), 110.11 (Ar-C). Anal. calcd. for C<sub>25</sub>H<sub>18</sub>N<sup>+</sup> [M]<sup>+</sup>: C, 81.62; H, 4.93; N, 3.81%; Found: C, 81.64; H, 4.91; N, 3.83 %.

**5n. 9-Benzyl-3-(naphthalen-2-yl)-9H-Carbazole.**

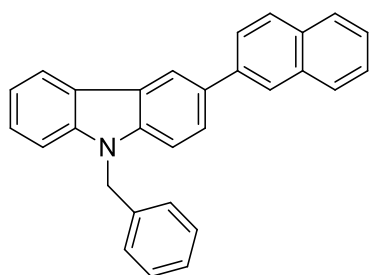

Colourless solid; M.P. 125-127°C. Yield: 97%; <sup>1</sup>H NMR (400MHz, CDCl<sub>3</sub>): δ (ppm), 8.46 (d, *J* = 1.2Hz, 1H, Ar-H), 8.20 (m, *J* = 6Hz, 1H, Ar-H), 8.125-8.123 (m, 1H, Ar-H), 7.93-7.85 (m, 4H, Ar-H), 7.79 (d(d), *J* = 1.6 & 1.6Hz, 1H, Ar-H), 7.51-7.42 (m, 4H, Ar-H), 7.38 (d, *J* = 6.8Hz, 1H, Ar-H), 7.29-7.22 (m, 4H, Ar-H), 7.16-7.15 (m, 2H, Ar-H), 5.52 (s, 2H, Ar-CH<sub>2</sub>). <sup>13</sup>C NMR (100MHz, CDCl<sub>3</sub>): δ (ppm), 141.20 (Ar-C), 140.28 (Ar-C), 139.46 (Ar-C), 137.12 (Ar-C), 133.94 (Ar-C),

132.65 (Ar-C), 132.31 (Ar-C), 128.87 (Ar-C), 128.40 (Ar-C), 128.13 (Ar-C), 127.71 (Ar-C), 127.58 (Ar-C), 126.48 (Ar-C), 126.26 (Ar-C), 126.15 (Ar-C), 125.72 (Ar-C), 125.60 (Ar-C), 125.56 (Ar-C), 123.71 (Ar-C), 123.24 (Ar-C), 120.57 (Ar-C), 119.48 (Ar-C), 119.26 (Ar-C), 109.30 (Ar-C), 109.15 (Ar-C), 46.74 (Ar-CH<sub>2</sub>). Anal. calcd. for C<sub>29</sub>H<sub>21</sub>N<sup>+</sup> [M]<sup>+</sup>: C, 90.83; H, 5.52; N, 3.65%; Found: C, 90.81; H, 5.54; N, 3.67%.

**5o. 9-Benzyl-3(thiophen-2-yl)-9H-Carbazole.**

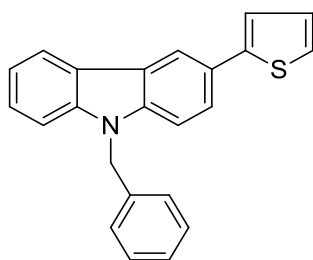

Yellow colour solid; M.P. 101-103°C. Yield: 90%; <sup>1</sup>H NMR (400MHz, CDCl<sub>3</sub>): δ (ppm), 8.33 (s, 1H, Ar-H), 8.16 (d, *J* = 6.4Hz, 1H, Ar-H), 7.68 (d(d), *J* = 1.6 ,& 1.6Hz, 1H, Ar-H), 7.50-7.49 (m, 1H, Ar-H), 7.468-7.460 (m, 1H, Ar-H), 7.44-7.40 (m, 2H, Ar-H), 7.38-7.36 ( m, 2H, Ar-H), 7.28-7.26 (m, 3H, Ar-H), 7.24-7.23 (m, 1H, Ar-H), 7.16-7.14 (m, 2H, Ar-H ), 5.53 (s, 2H, Ar-CH<sub>2</sub>). <sup>13</sup>C NMR (100MHz, CDCl<sub>3</sub>): δ (ppm): 143.24 (Ar-C), 141.13 (Ar-C), 140.02 (Ar-C), 137.08 (Ar-C), 128.83 (Ar-C), 127.69 (Ar-C), 127.53 (Ar-C), 126.75 (Ar-C), 126.43 (Ar-C) 126.10 (Ar-C), 126.04 (Ar-C), 124.91 (Ar-C), 123.46 (Ar-C), 123.12 (Ar-C), 120.48 (Ar-C), 119.39 (Ar-C), 118.96 (Ar-C), 118.27 (Ar-C), 109.15 (Ar-C), 109.09 (Ar-C), 46.86 (Ar-CH<sub>2</sub>). Anal. calcd. for C<sub>23</sub>H<sub>17</sub>N<sup>+</sup> [M]<sup>+</sup>: C, 81.38; H, 5.05; N, 4.13%; Found: C, 81.36; H, 5.03; N, 4.15 %.

**5p. 3-(p-tolyl)-9-(2,4,6-trimethylbenzyl)-9H-Carbazole.**

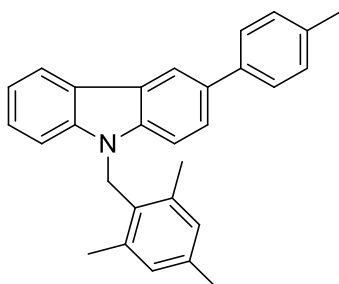

Colourless solid; M.P. 153-155°C. Yield: 95%; <sup>1</sup>H NMR (400MHz, CDCl<sub>3</sub>): δ (ppm): 8.26 (d, *J*= 1.2Hz, 1H, Ar-H), 8.12 (d, *J* = 6.4Hz, 1H, Ar-H), 7.58-7.54 (m, 3H, Ar-H), 7.36-7.32 (m, 1H, Ar-

H), 7.26-7.12 (m, 5H, Ar-H), 6.89 (s, 2H, Ar-H), 5.43 (s, 2H, Ar-CH<sub>2</sub>-), 2.39 (s, 3H, Ar-CH<sub>3</sub>-), 2.29 (s, 3H, Ar-CH<sub>3</sub>), 2.18 (s, 6H, Ar-(CH<sub>3</sub>)<sub>2</sub>). <sup>13</sup>C NMR (100MHz,CDCl<sub>3</sub>): δ (ppm): 141.26 (Ar-C), 140.14 (Ar-C), 139.20 (Ar-C), 137.64 (Ar-C), 137.59 (Ar-C), 136.05 (Ar-C), 132.29 (Ar-C), 129.78 (Ar-C), 129.49 (Ar-C), 127.08 (Ar-C), 125.81 (Ar-C), 125.10 (Ar-C), 123.60 (Ar-C), 123.24 (Ar-C), 120.26 (Ar-C), 119.01 (Ar-C), 118.42 (Ar-C), 109.65 (Ar-C), 109.53 (Ar-C), 43.28 (Ar-CH<sub>2</sub>-), 21.12 (Ar-CH<sub>3</sub>), 21.02 (Ar-CH<sub>3</sub>), 20.50 (Ar-CH<sub>3</sub>). Anal. calcd. for C<sub>29</sub>H<sub>27</sub>N<sup>+</sup> [M]<sup>+</sup>: C, 89.42; H, 6.99; N, 3.60%; Found: C, 89.44; H, 6.97; N, 3.62 %.

### XIII. Copies of (<sup>1</sup>H&<sup>13</sup>C) NMR and HRMS Spectra

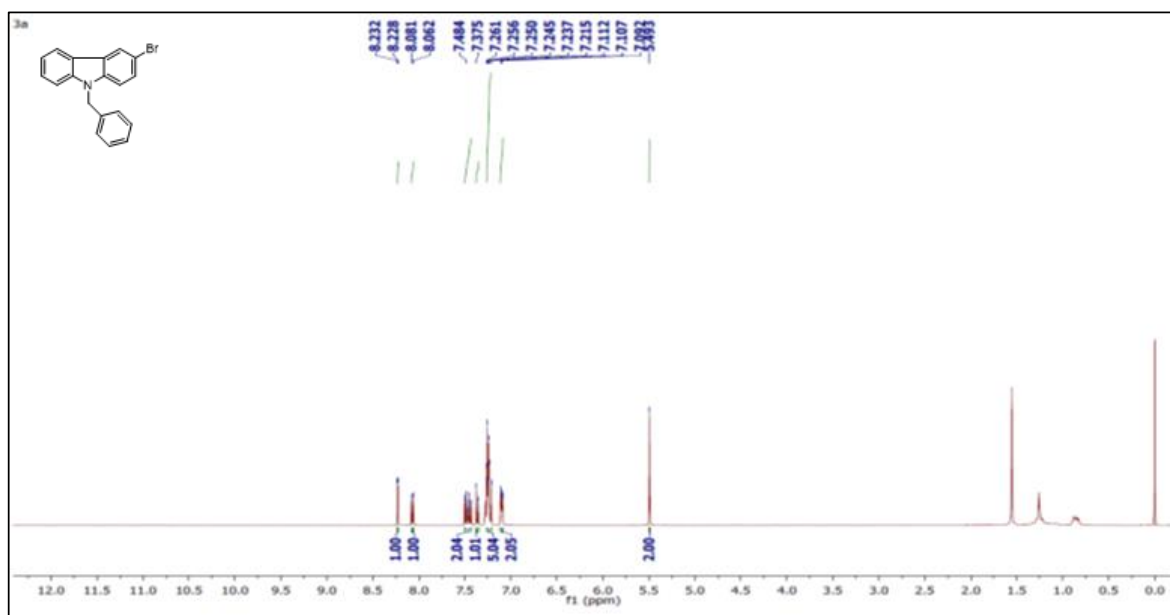



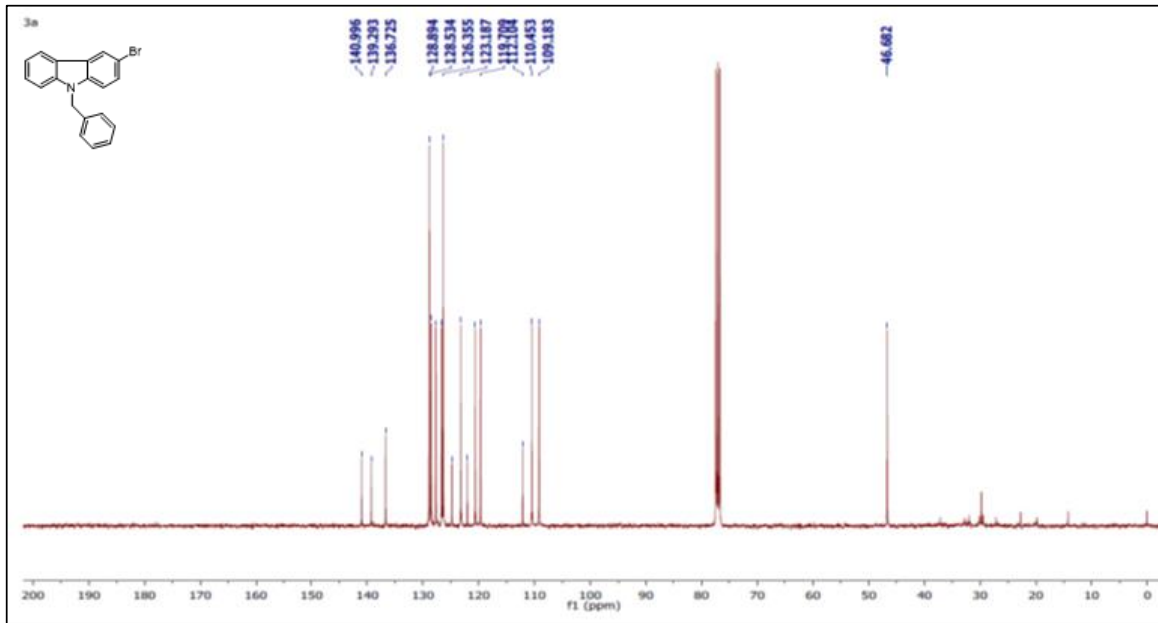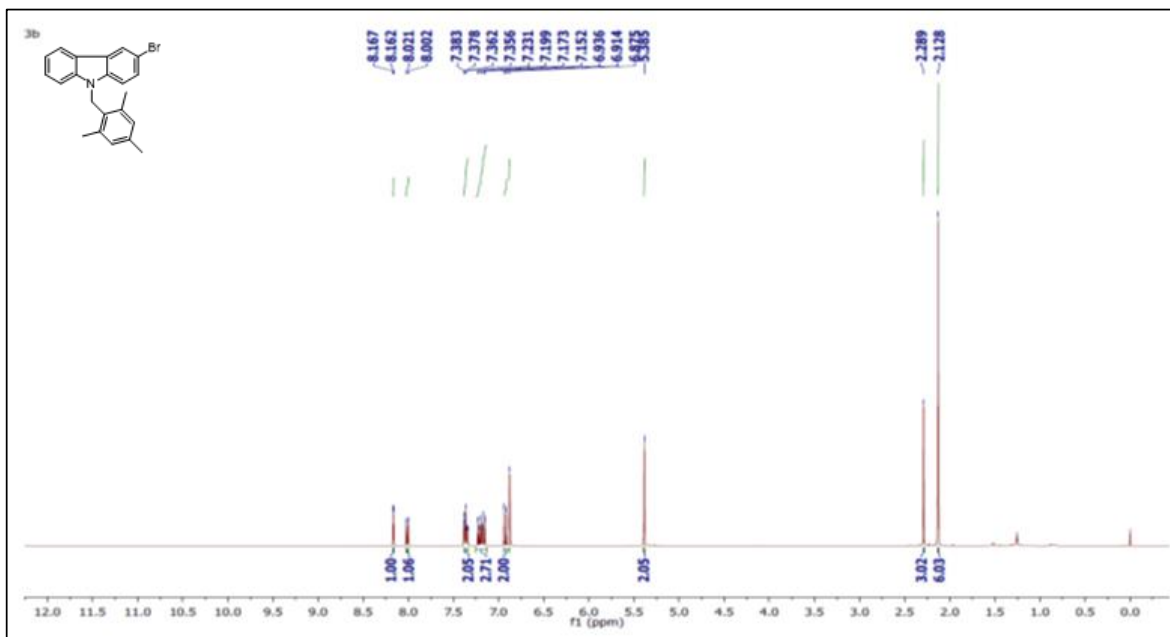

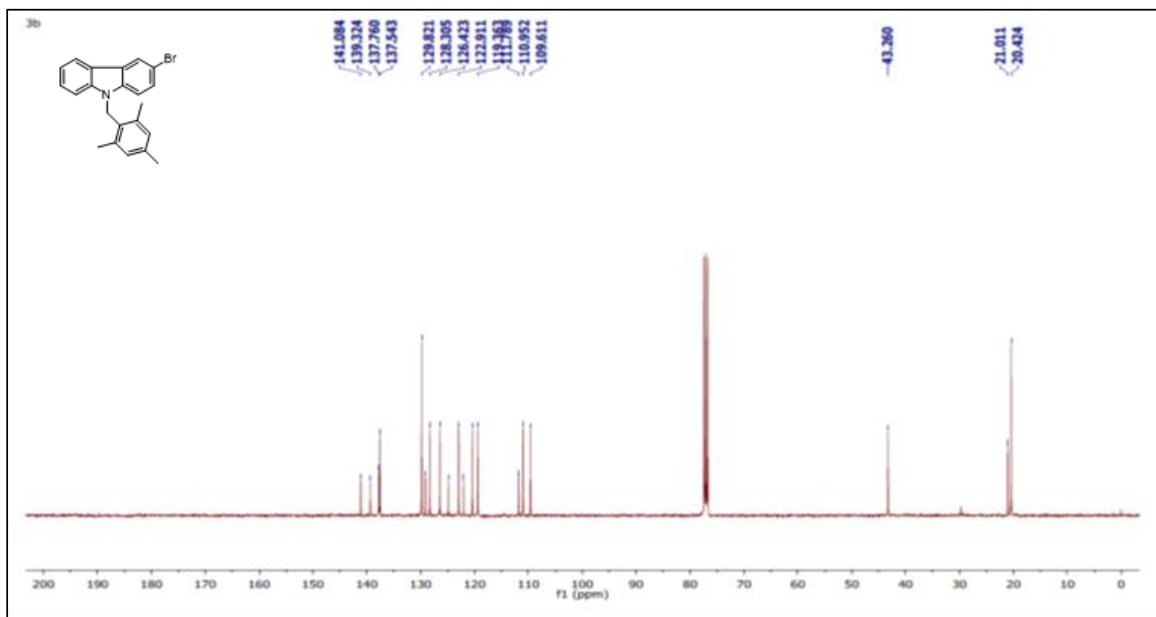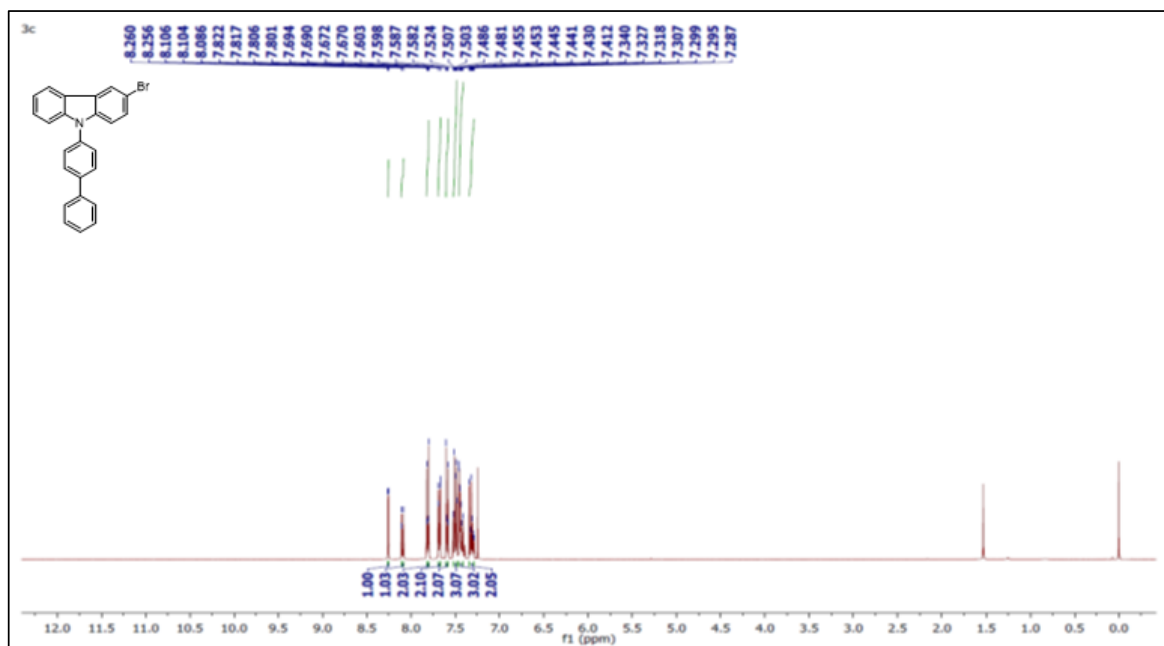

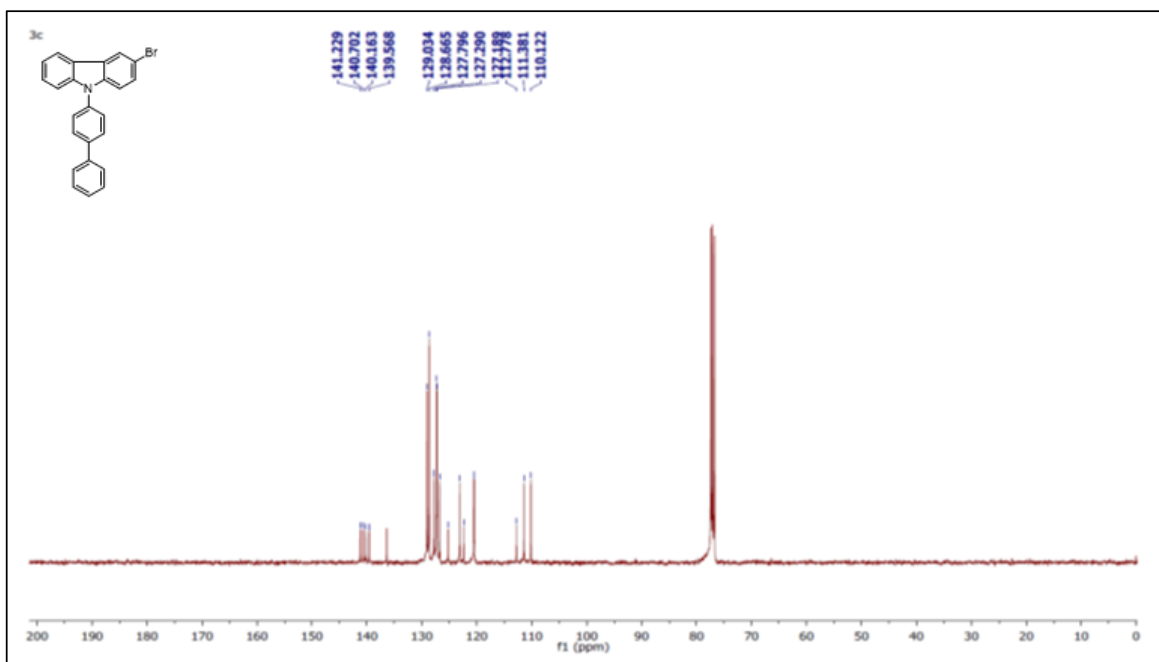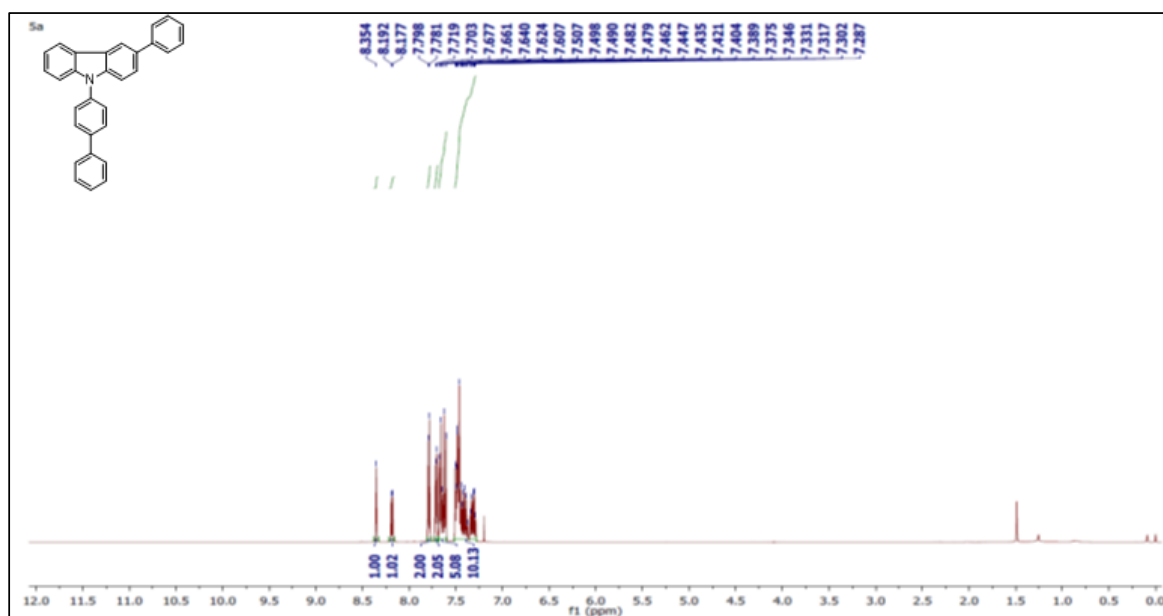

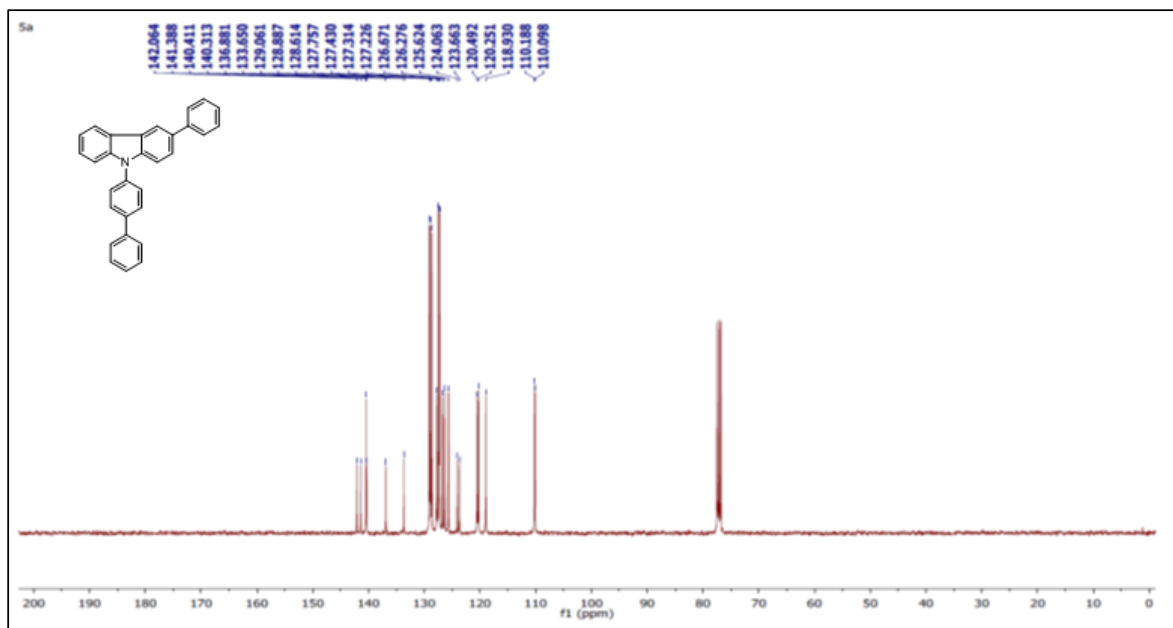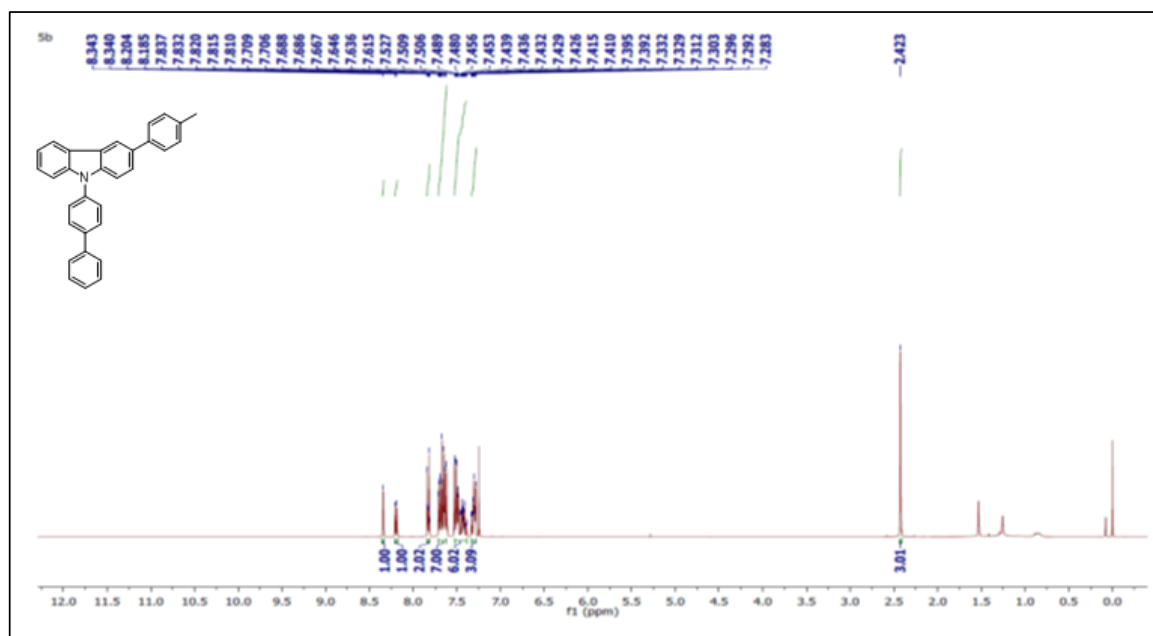

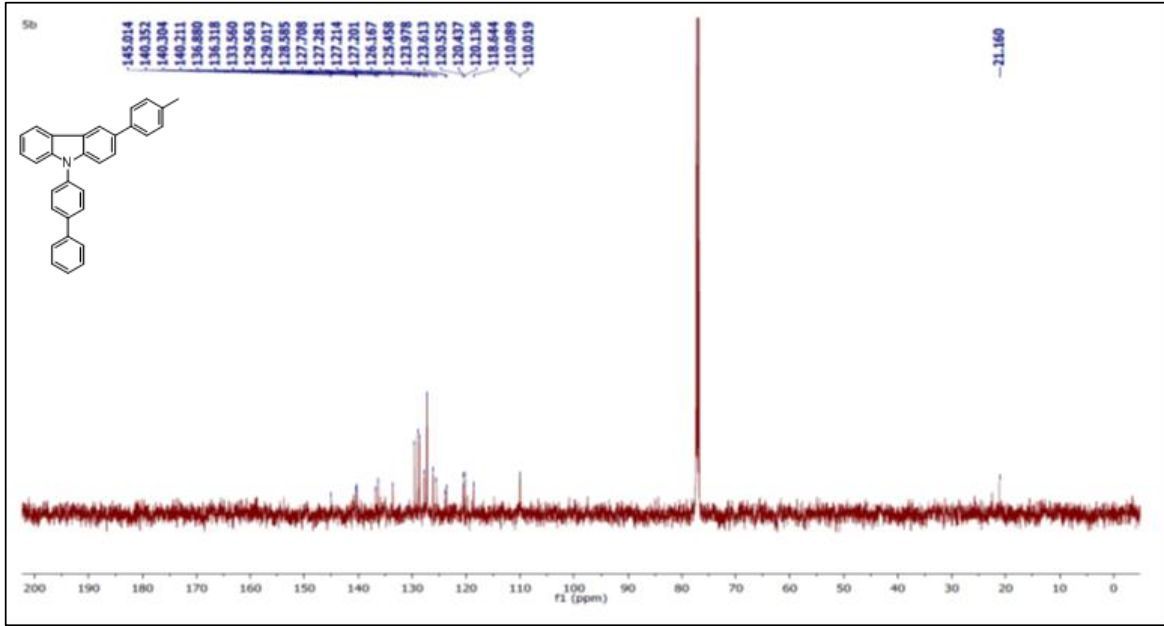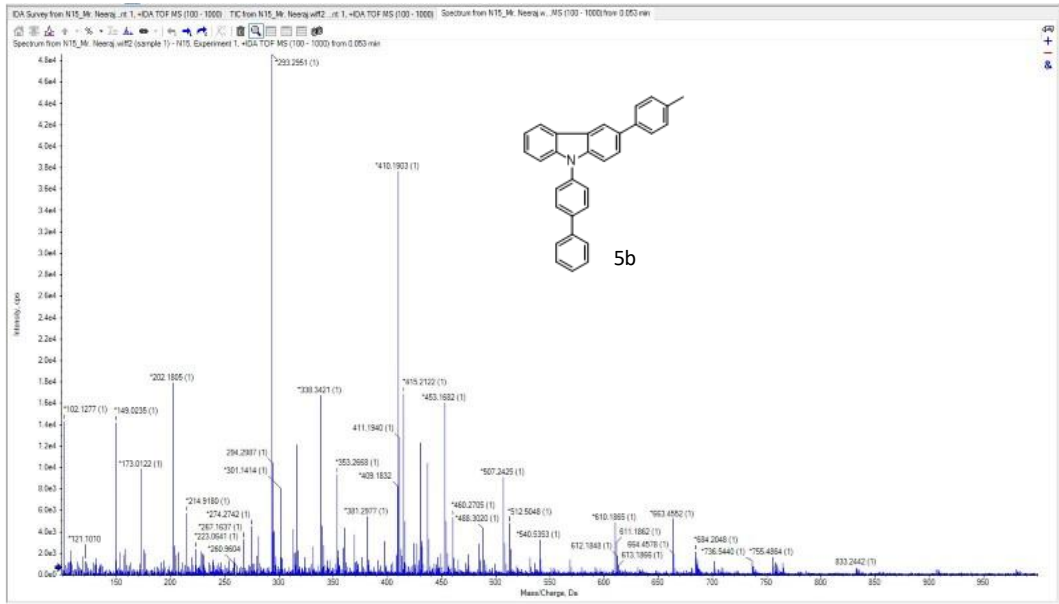

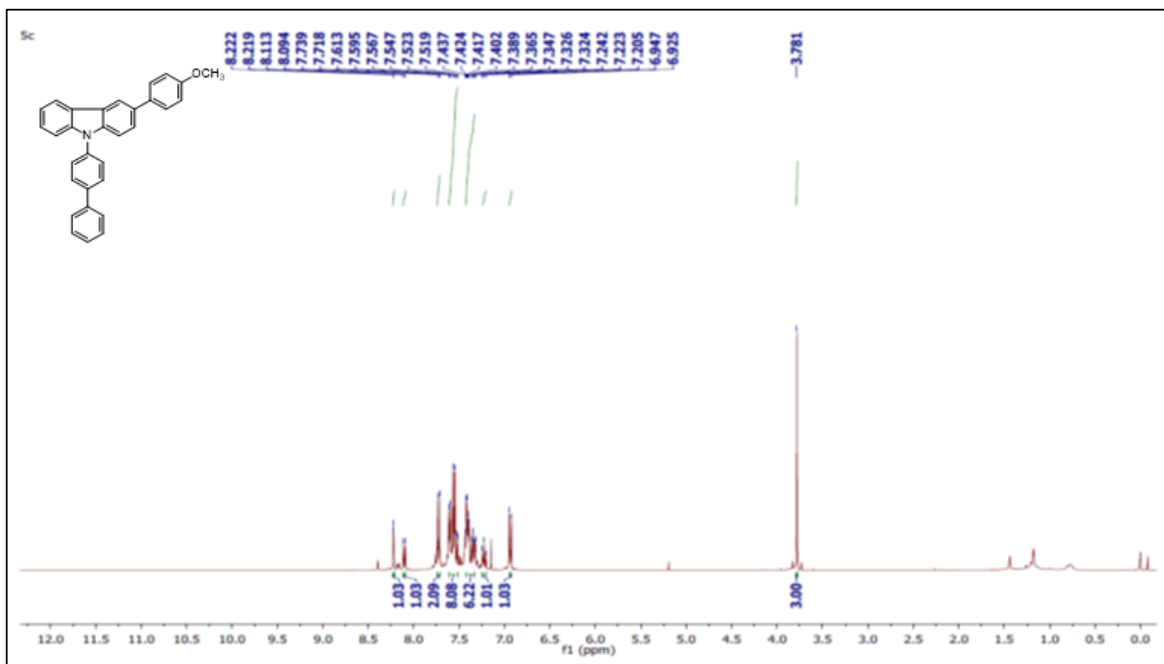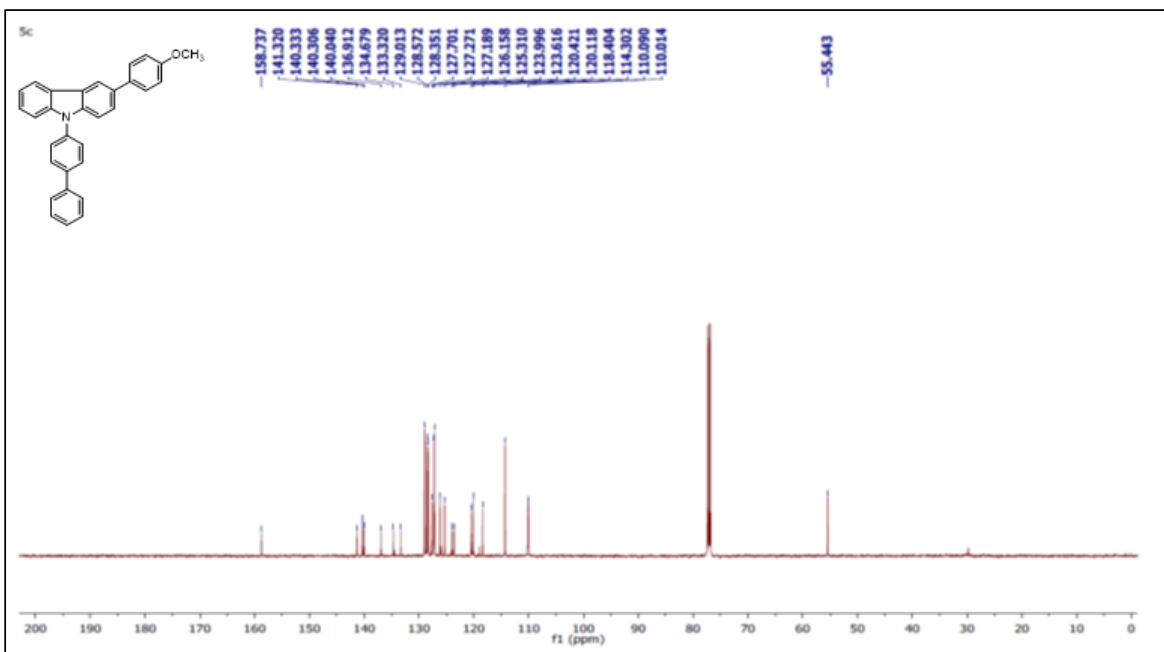

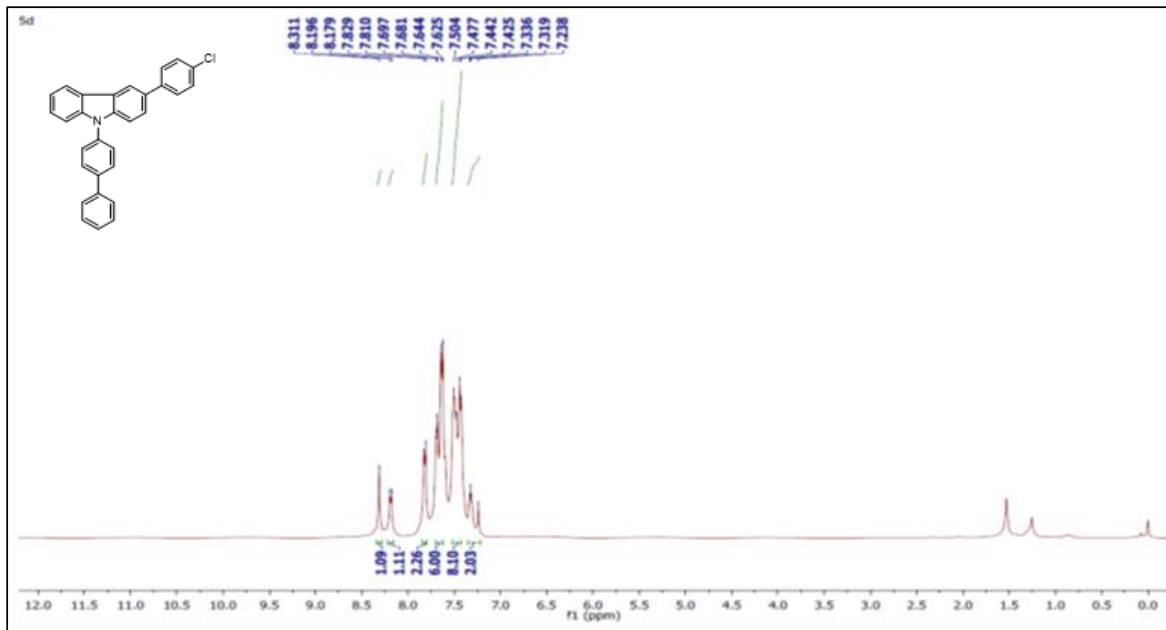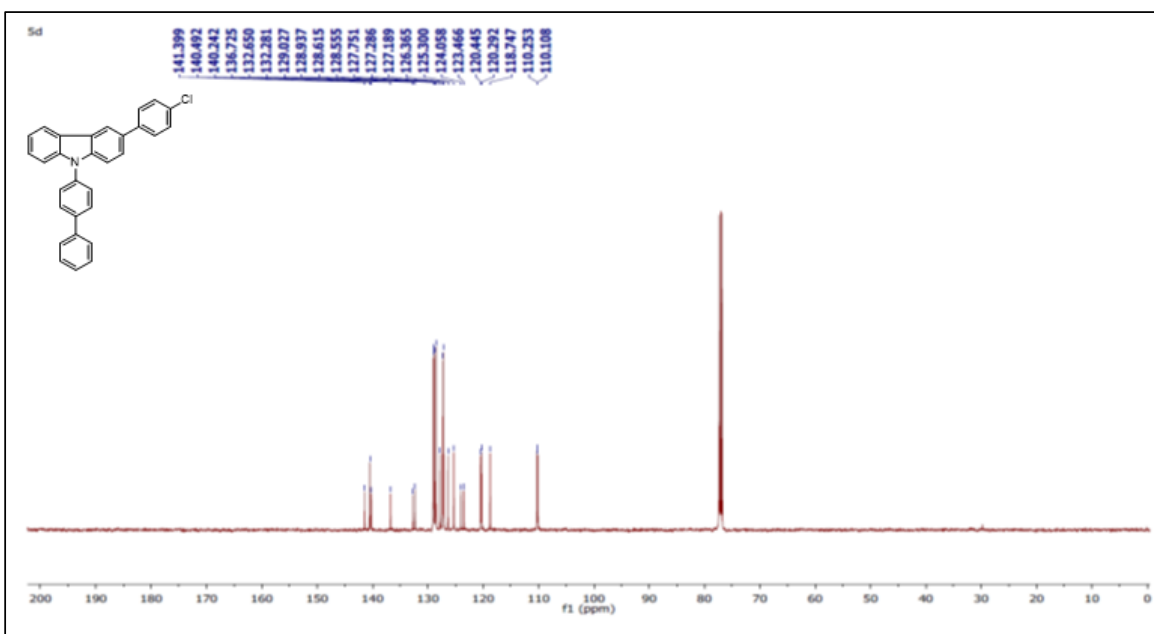

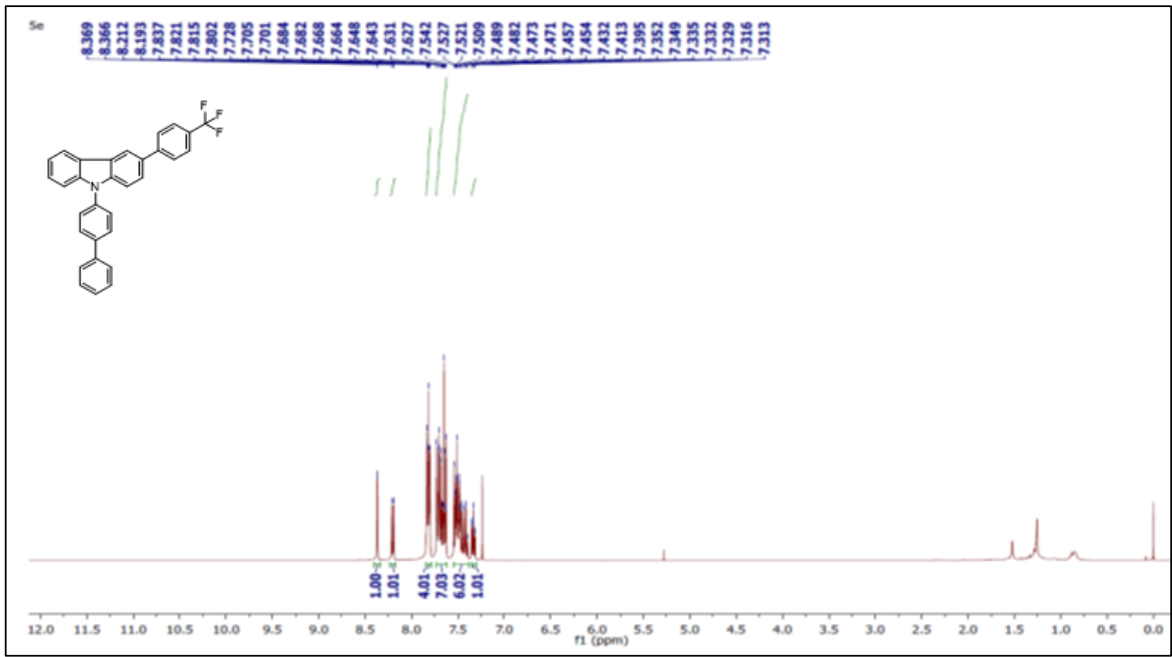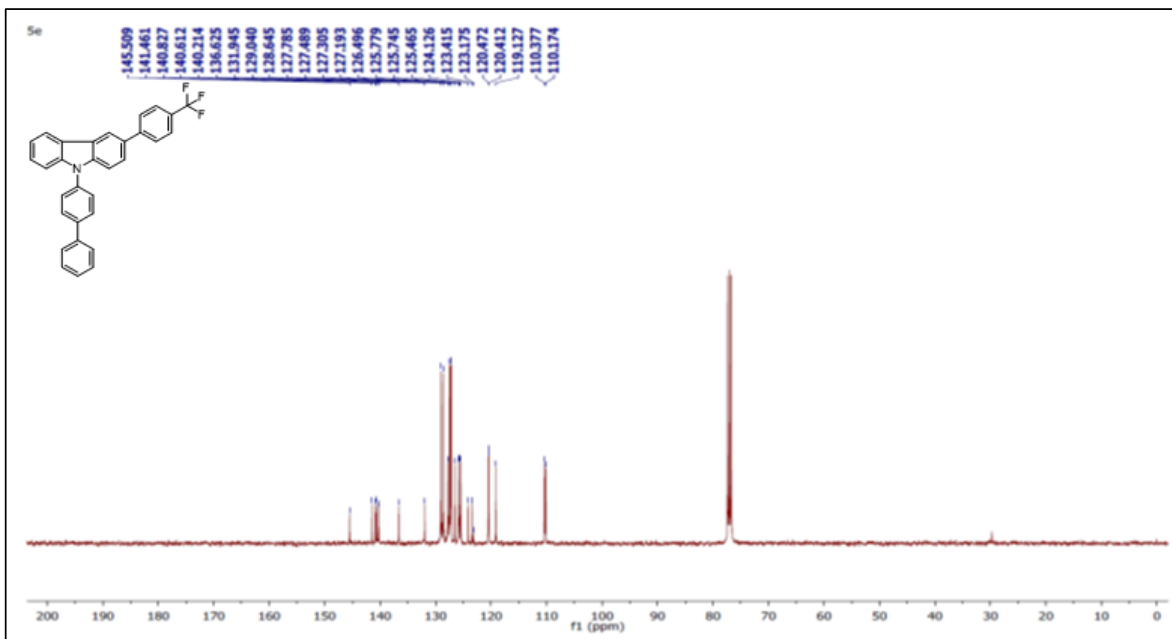



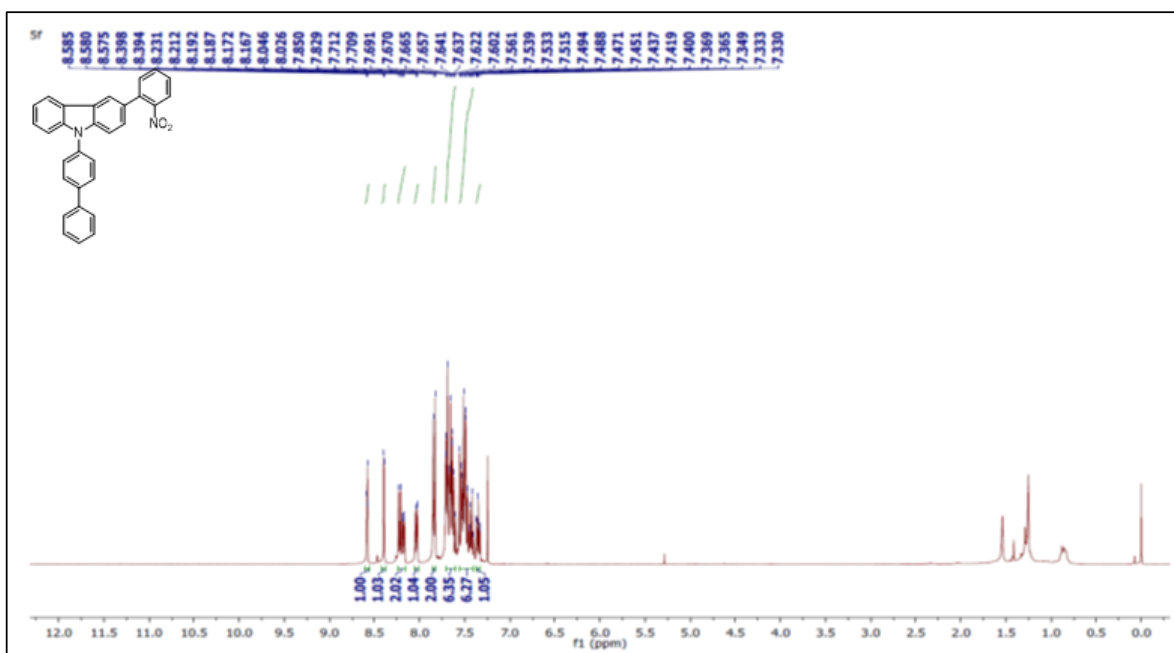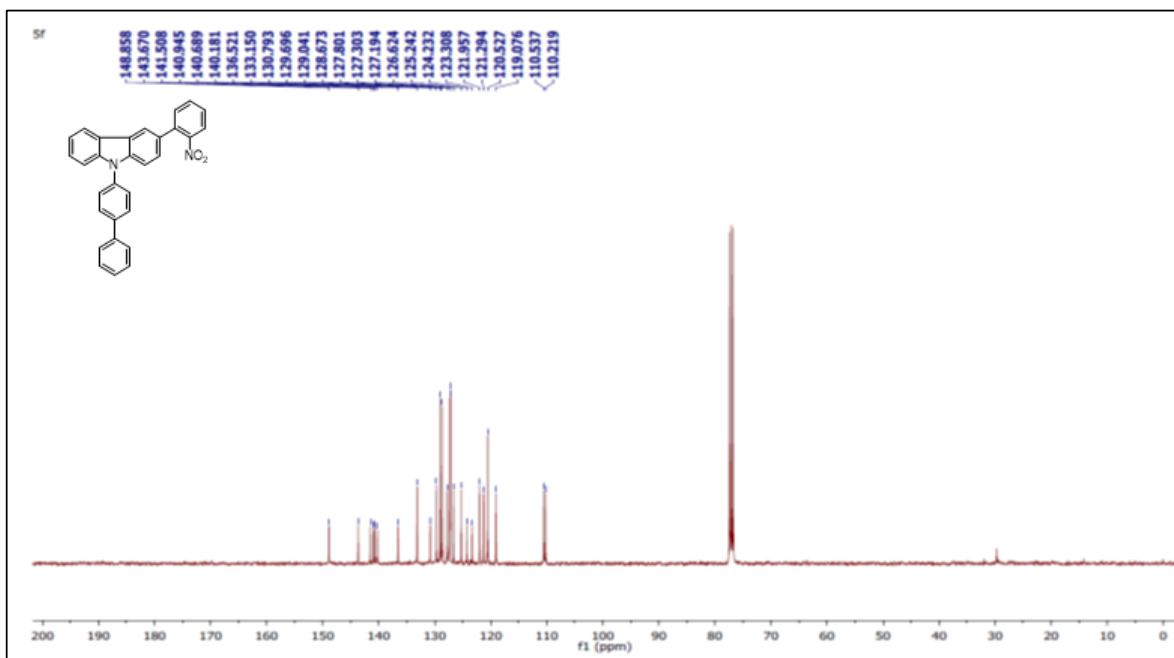

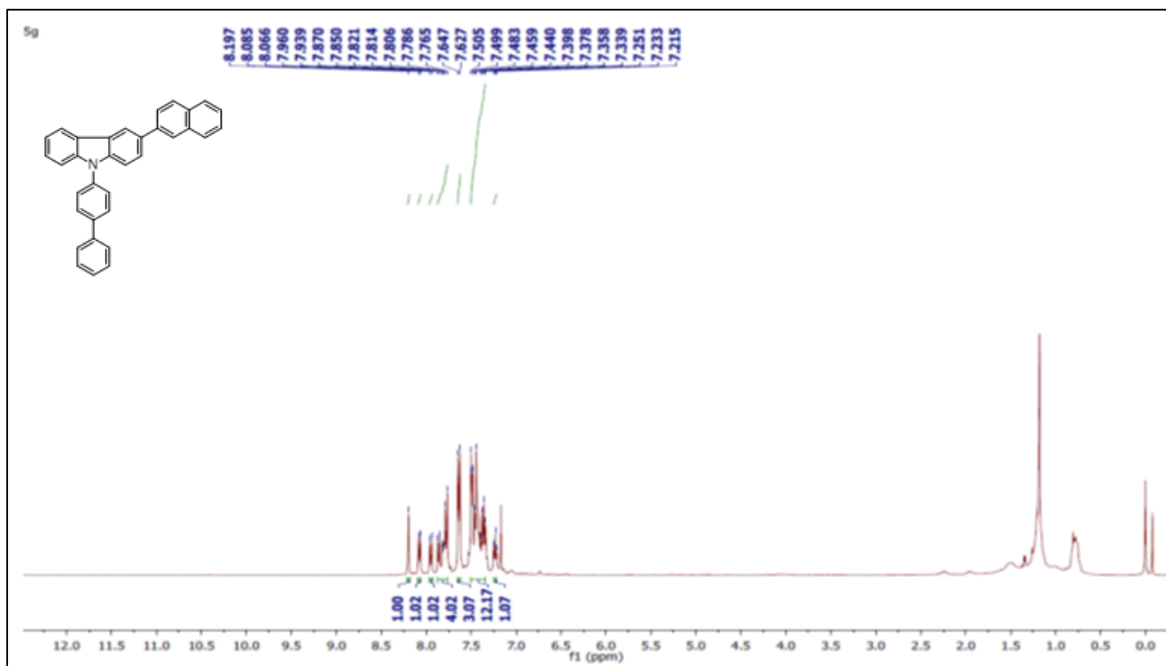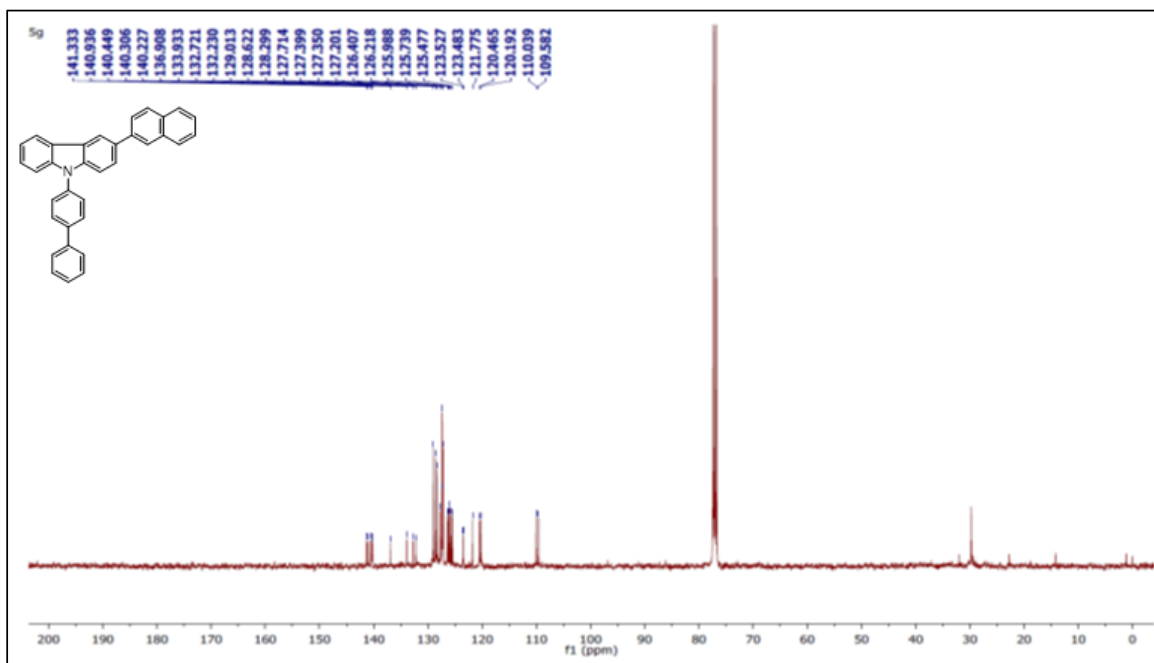

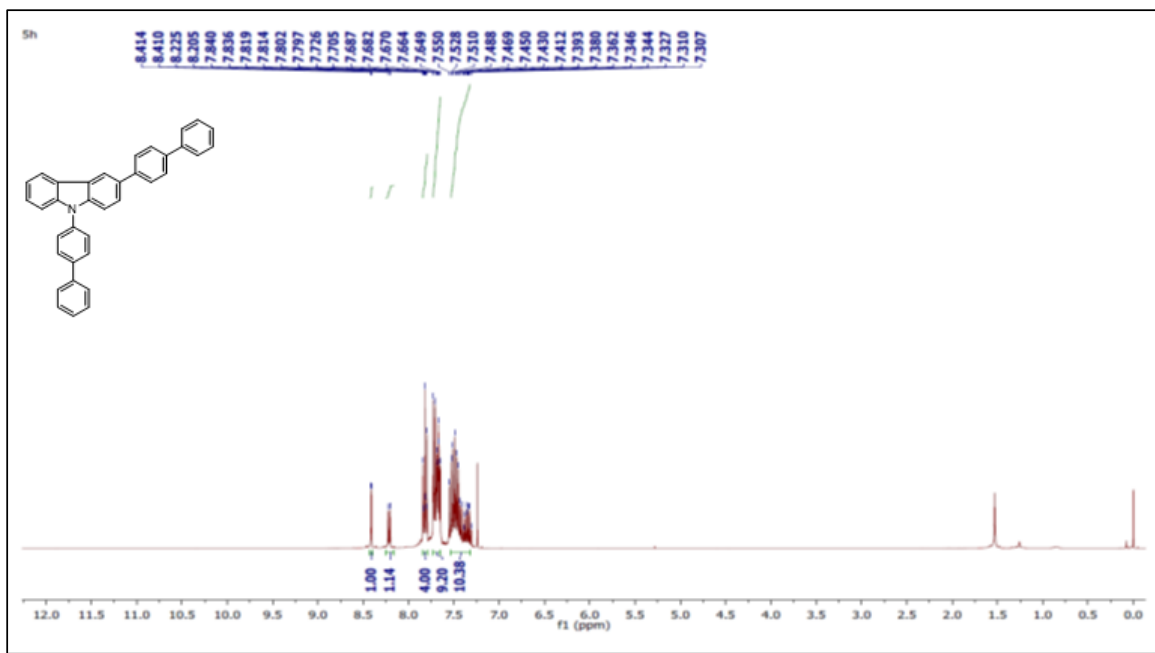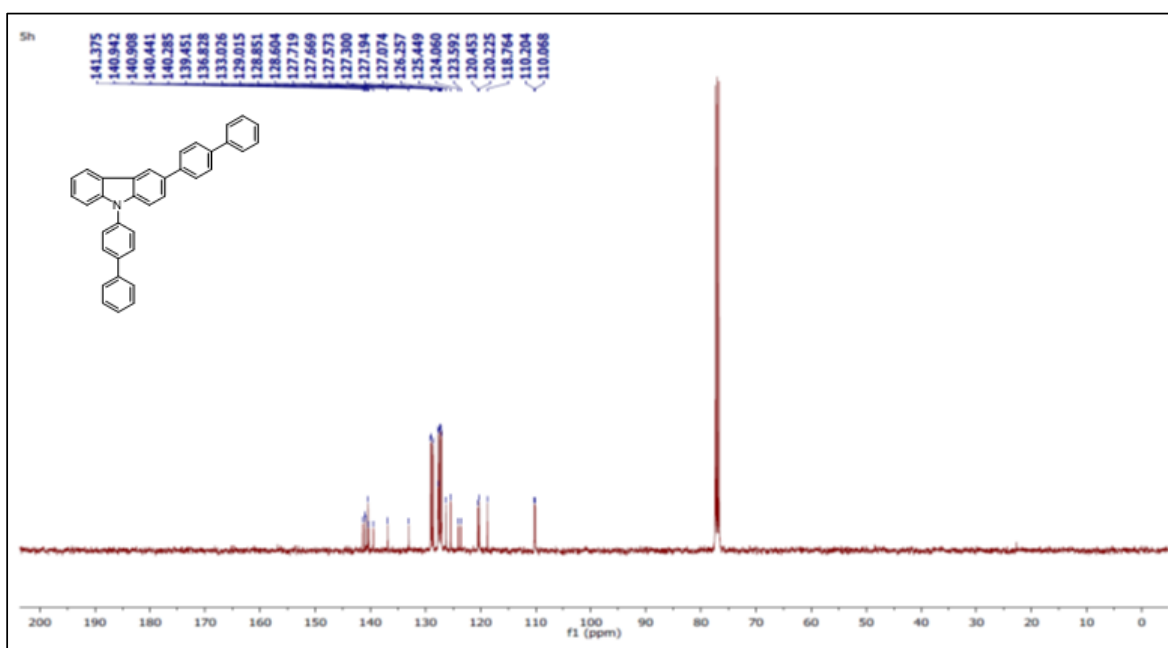

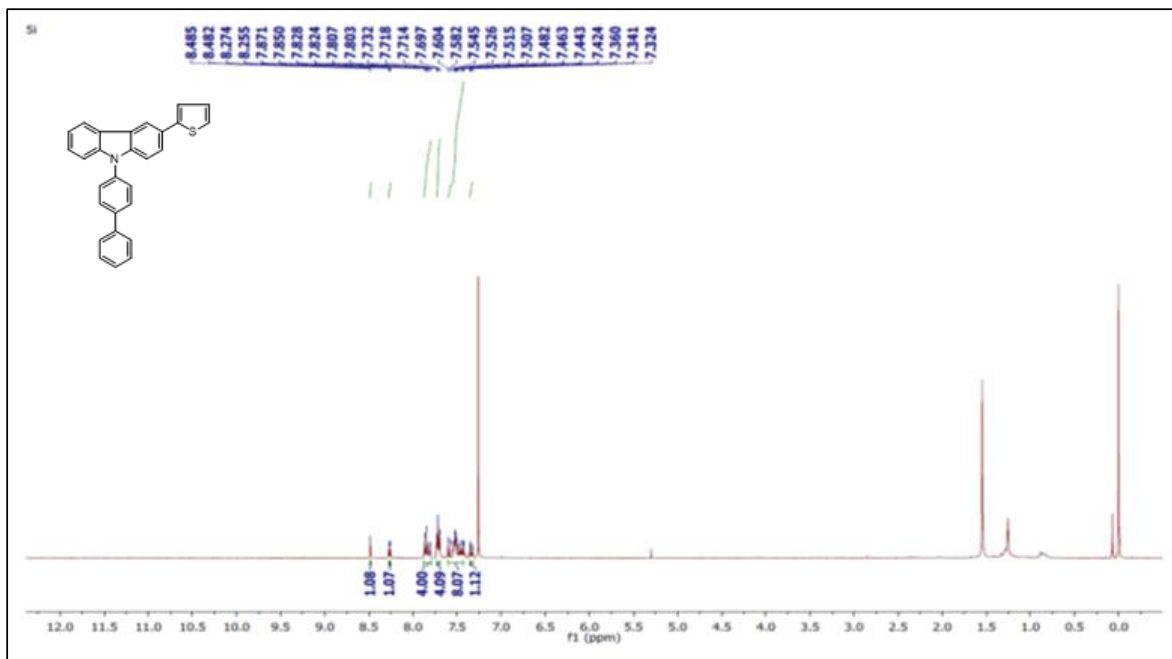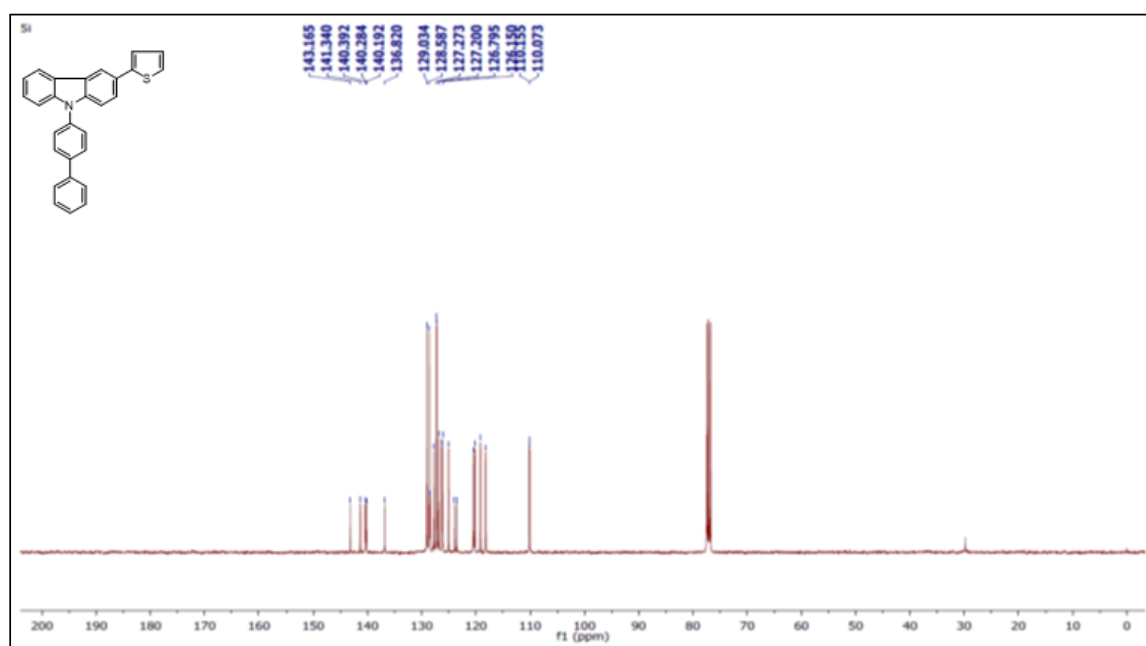

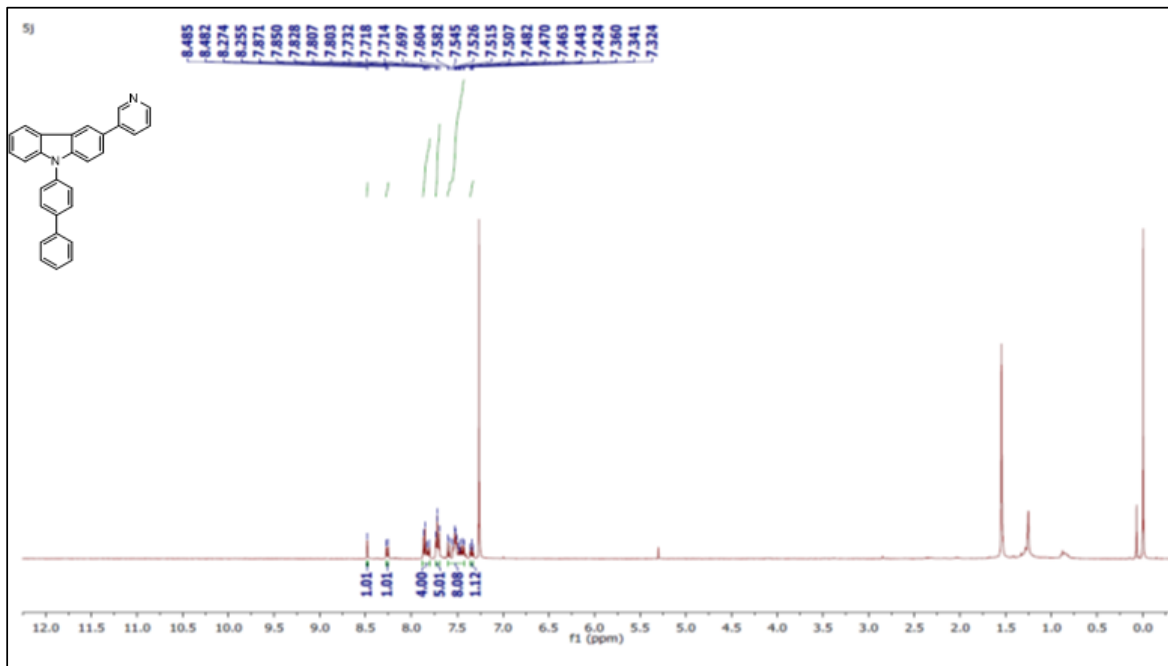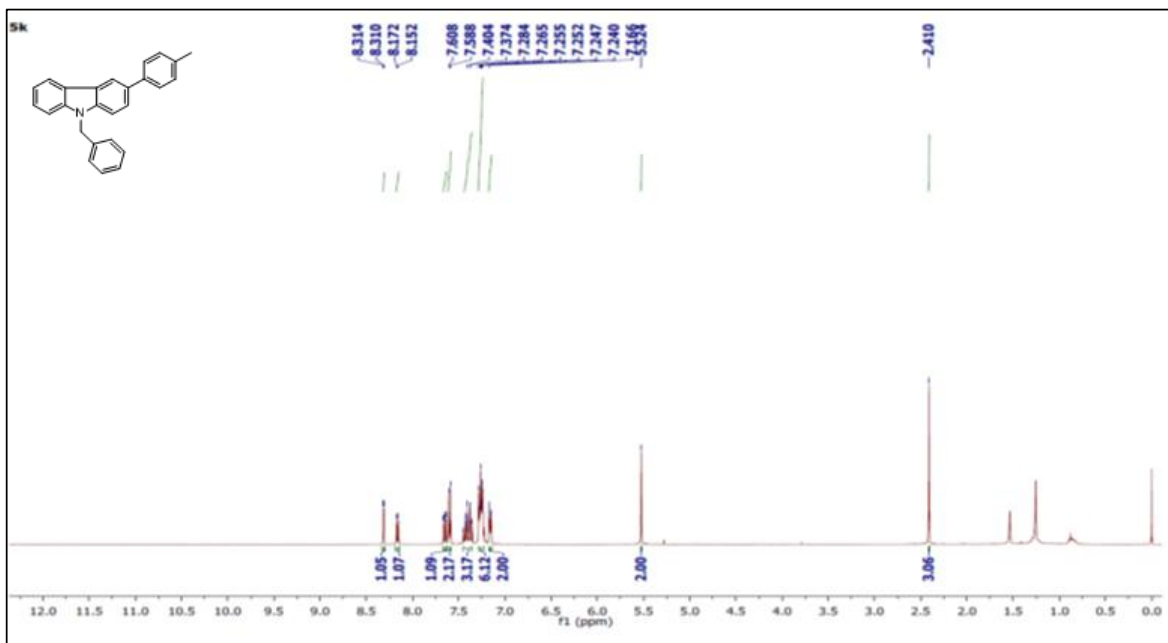

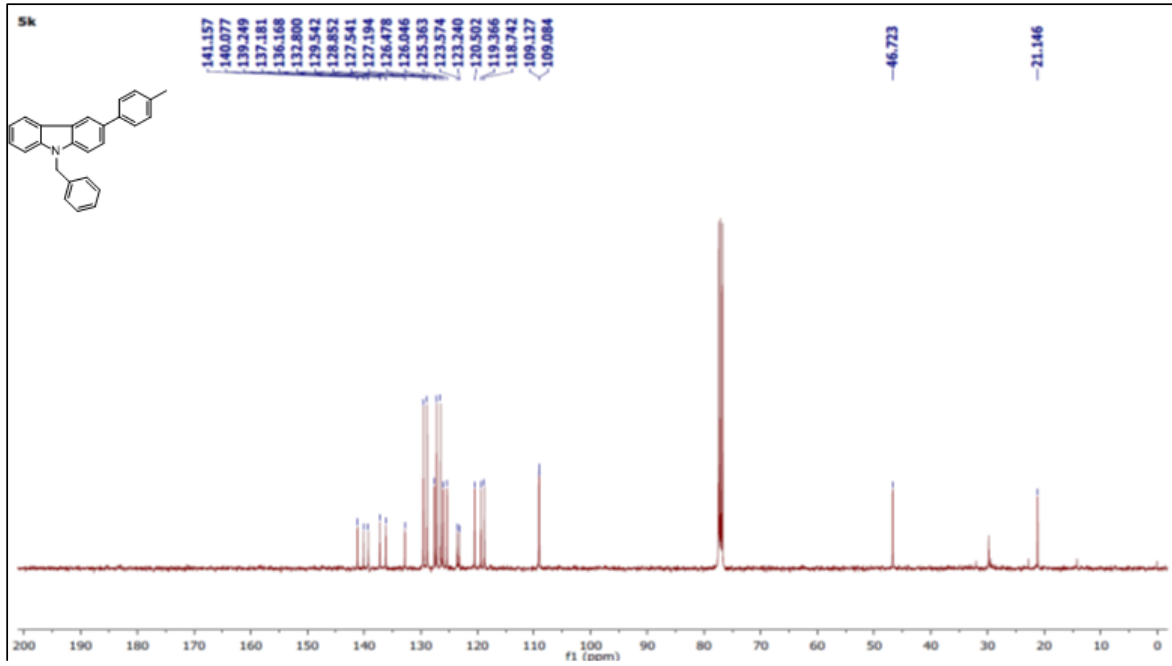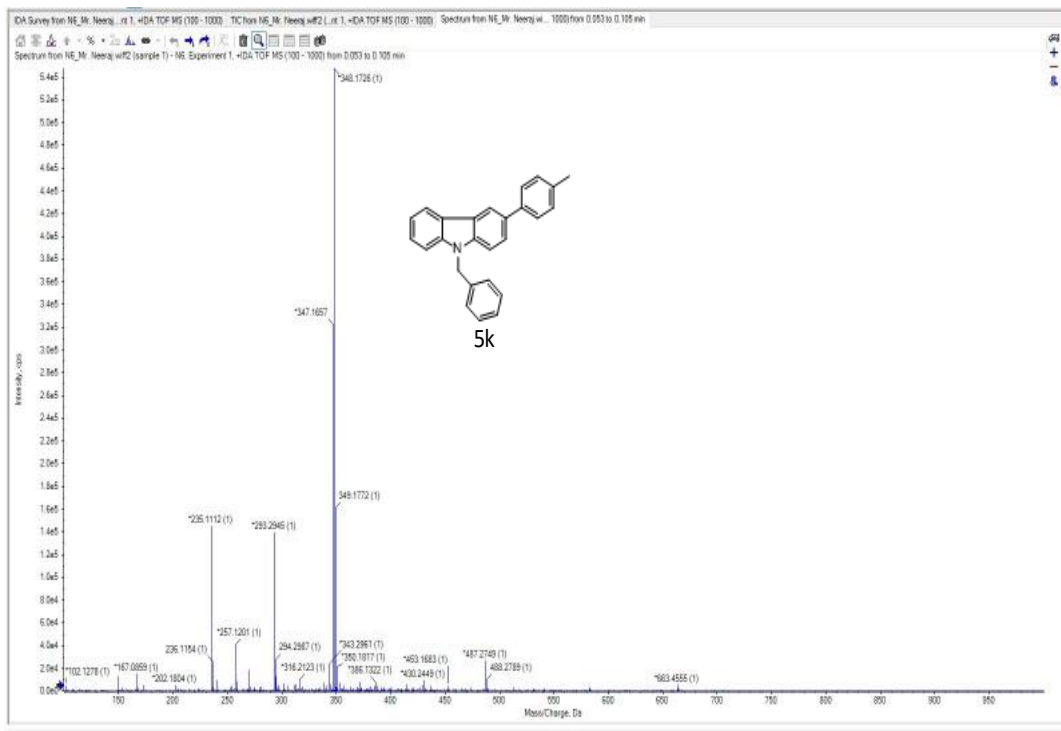

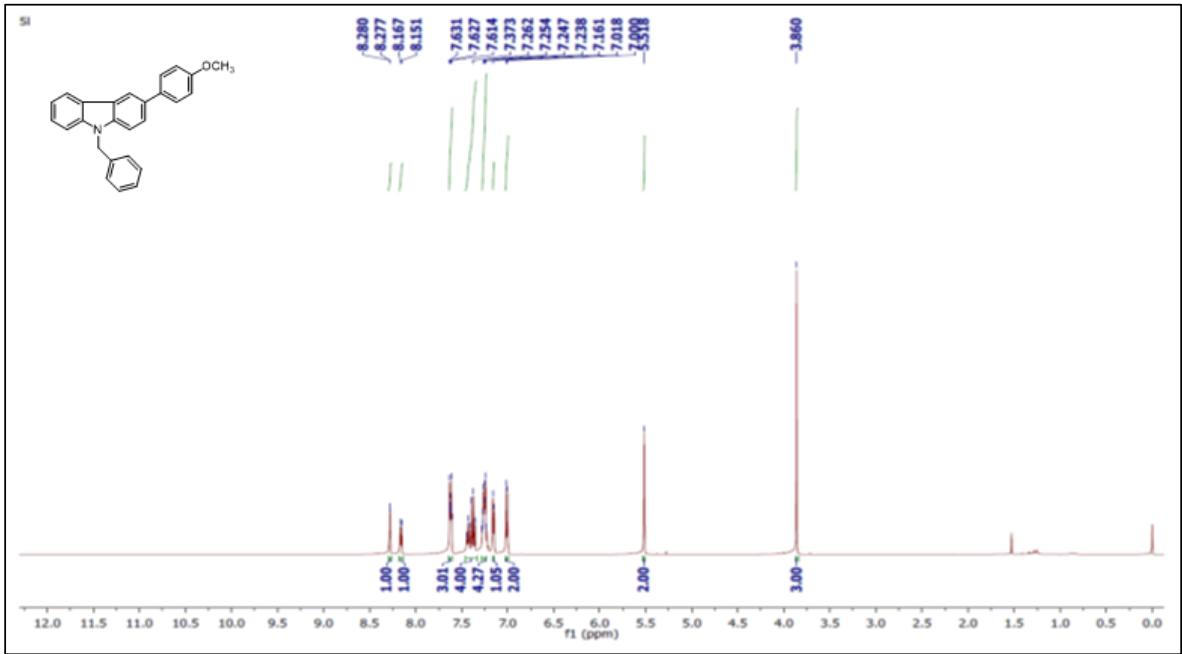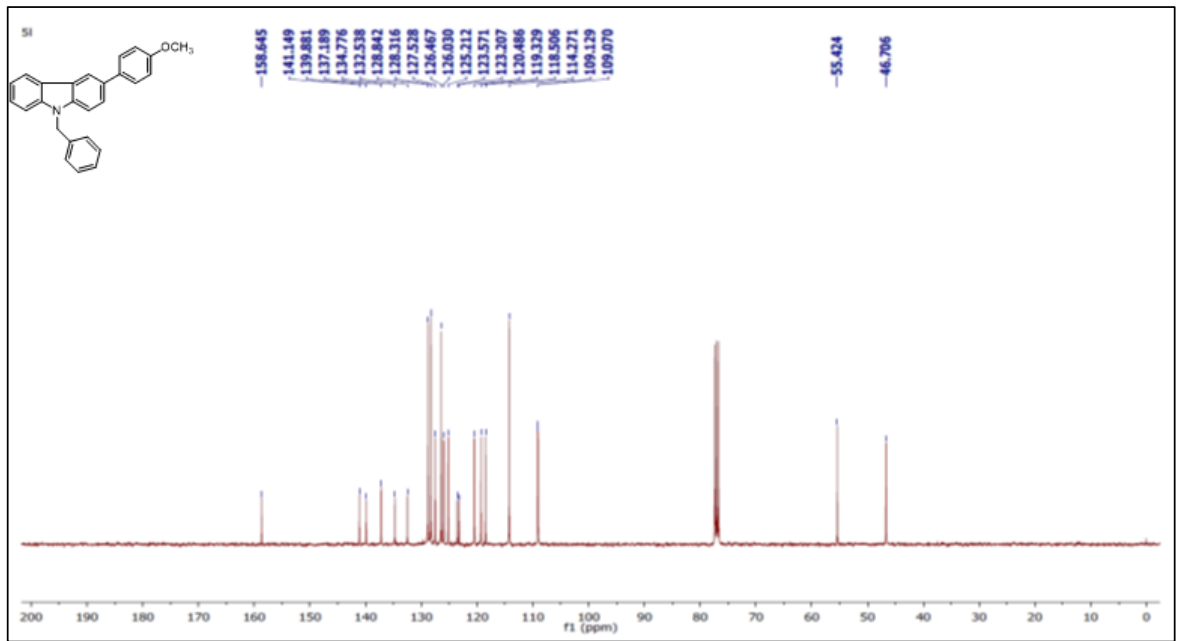

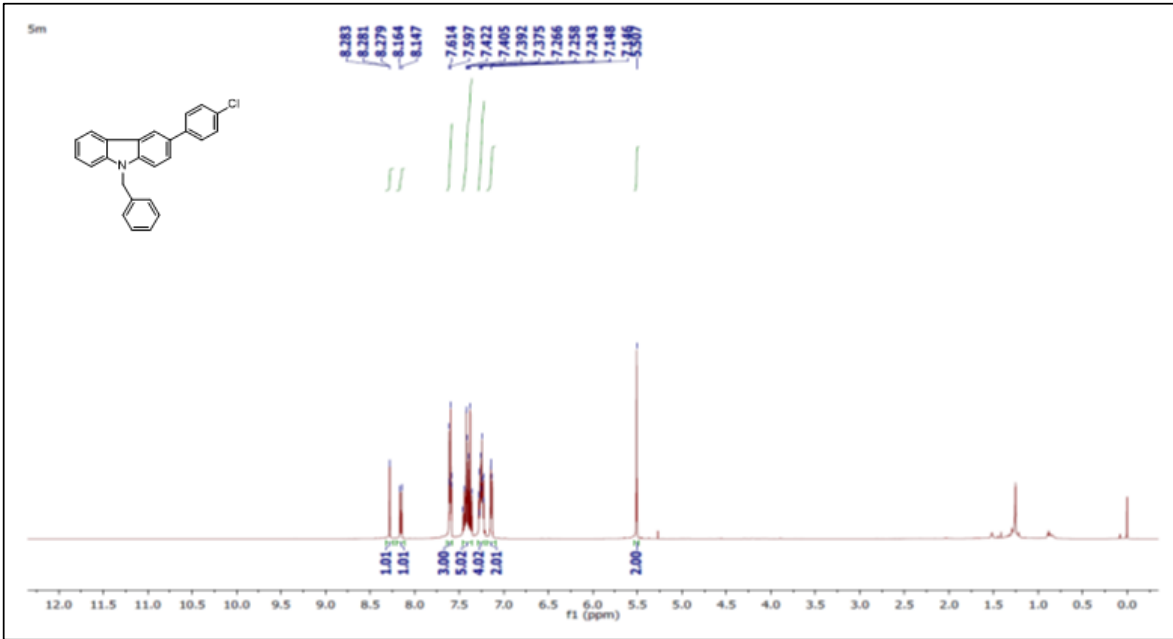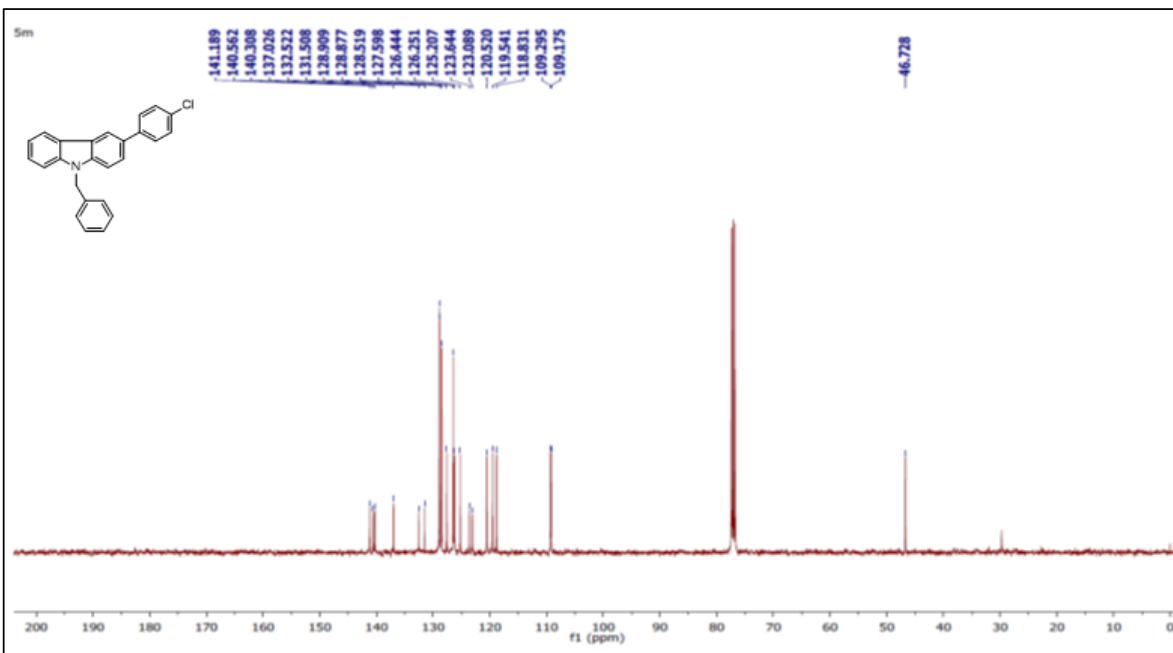



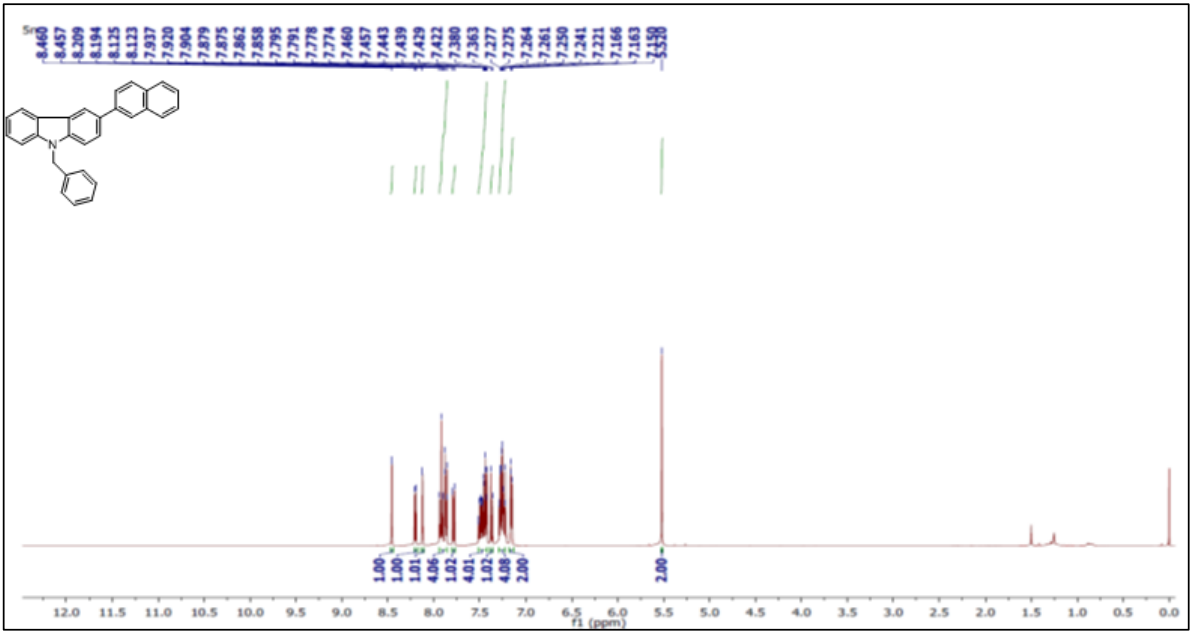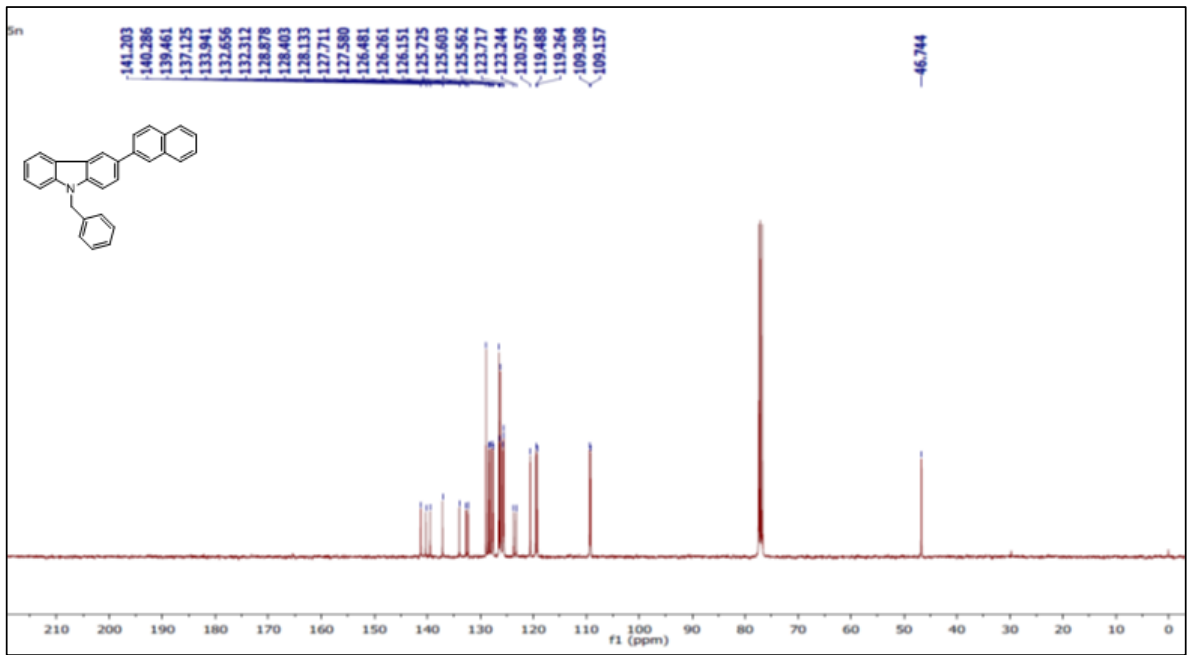

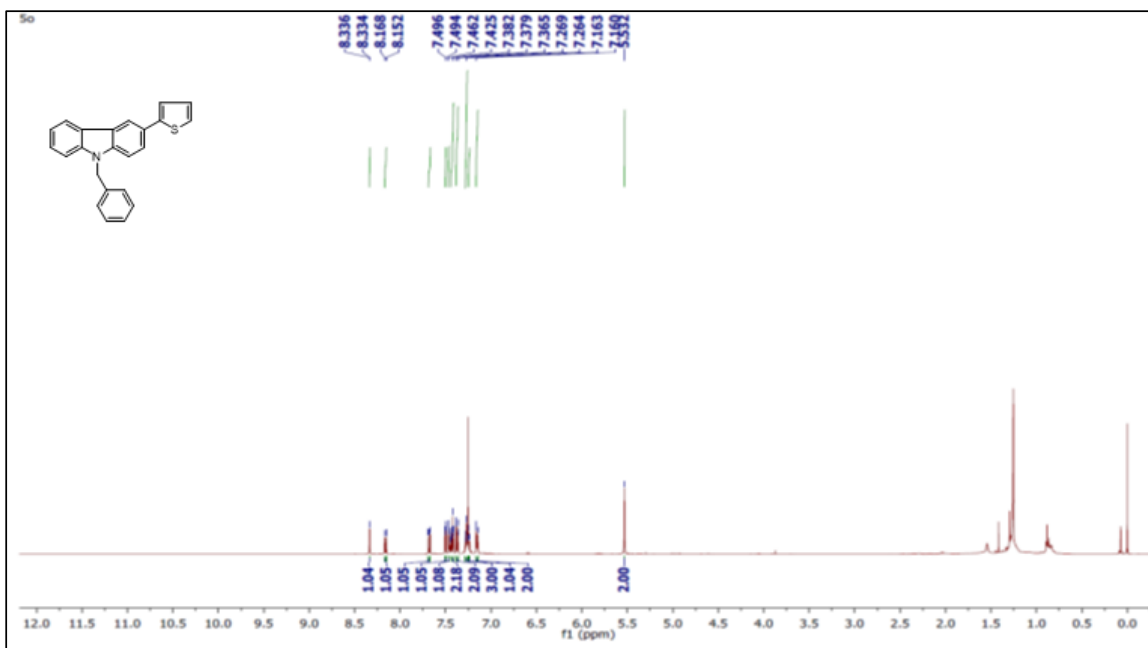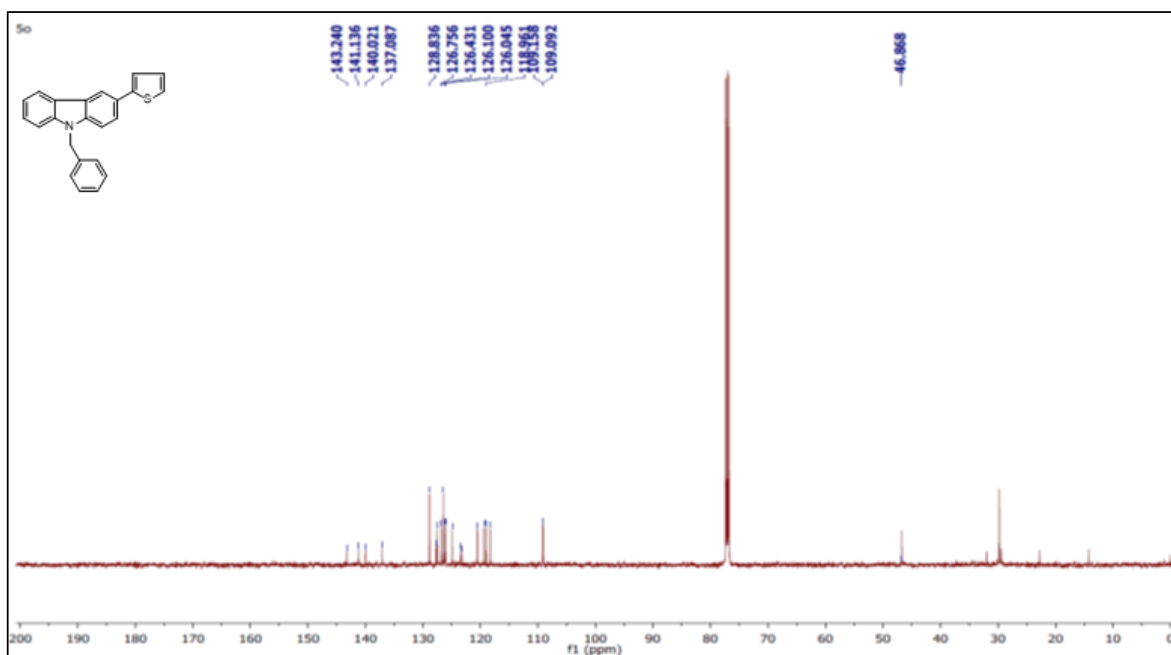

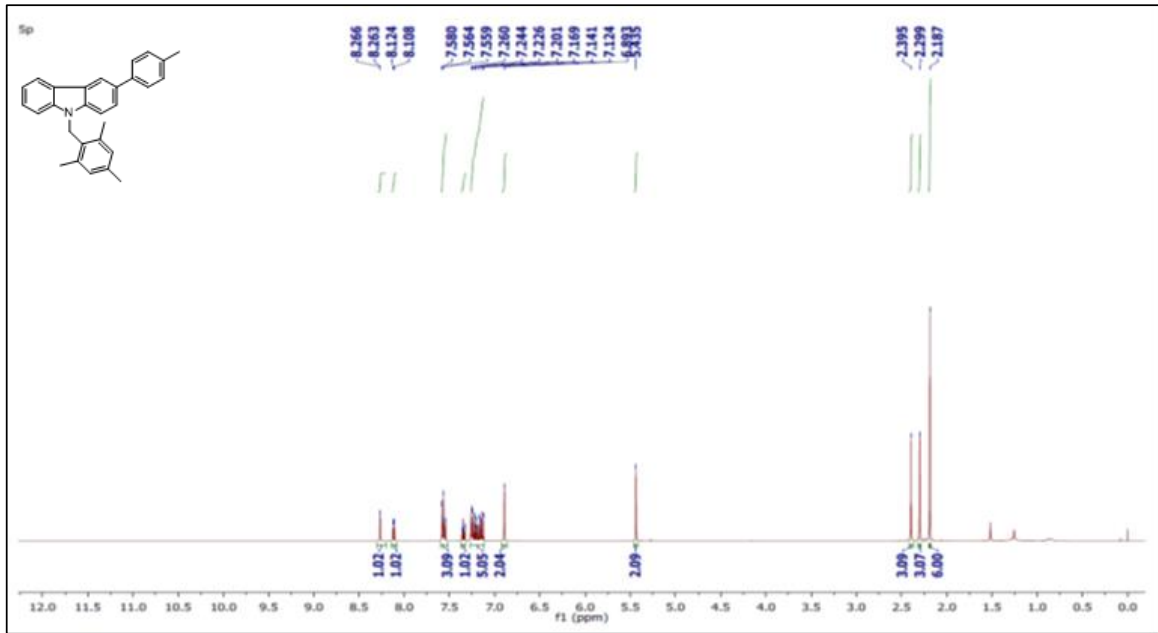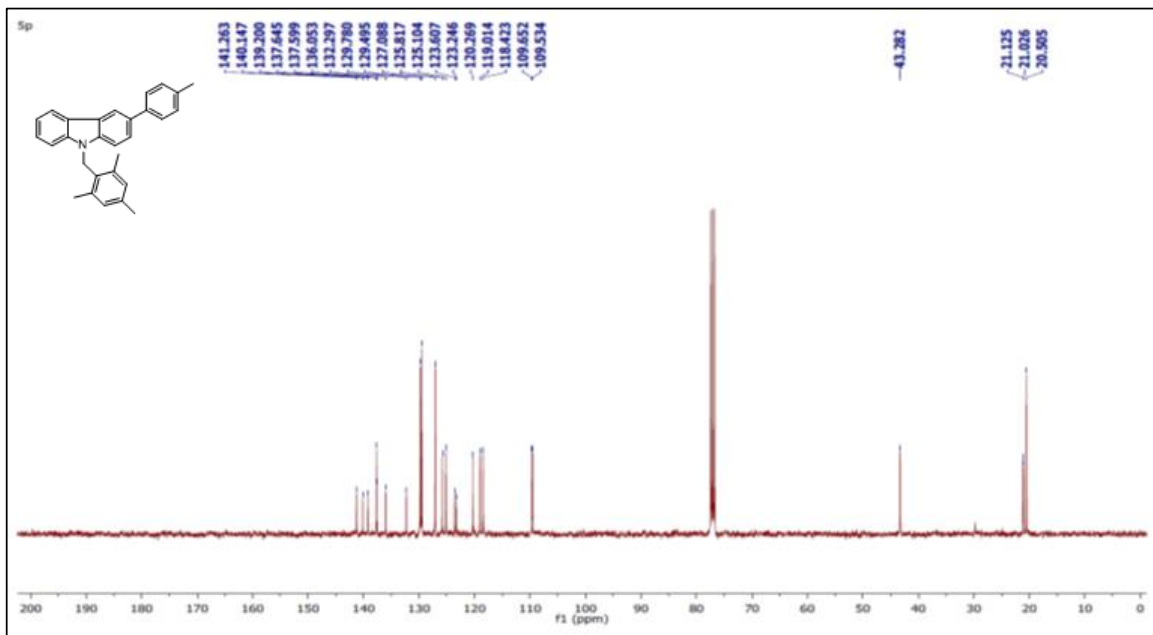

#### XIV. References:

1. A. Gupta, R. Jamatia, B. Dam and A. K. Pal, Development of Synergistic, Dual Pd-Cu@rGO catalyst for Suzuki, Heck and Click Reactions: Facile Synthesis of Triazole or Tetrazole Containing Biaryls and Stilbenes, *ChemistrySelect.*, 2018, **3**, 8212-8220.
2. L.V. Jing-Jing, W. Zheng-Jun, F. Jiu-Ju, Q. Renhua, W. Ai-Jun and X. Xinhua, Facile synthesis of highly active Pd-Cu nanowires catalyst through a simple wet-chemical strategy for ligand-free Suzuki cross coupling reaction, *Appl Catal A: Gen.*, 2016, **522**, 188-193.
3. F. Yi-Si, L. Xin-Yan, H. Jian and X. Hua-Jian, Pd-Co bimetallic nanoparticles supported on graphene as a highly active catalyst for Suzuki-Miyaura and Sonogashira cross-coupling reactions, *Tetrahedron.*, 2014, **70**, 5249-5253.
4. M. Nasrollahzadeh, A. Azarian, M. Maham and A. Ehsani, Synthesis of Au/Pd bimetallic nanoparticles and their applications in the Suzuki coupling reaction, *J Ind Eng Chem.*, 2014, **21**, 746-748.
5. R. Nie, J. Shi, W. Du and Z. Hou, Ni<sub>2</sub>O<sub>3</sub>-around-Pd hybrid on graphene oxide: An efficient catalyst for ligand-free Suzuki-Miyaura coupling reaction, *Appl. Catal. A: Gen.*, 2014, **473**, 1-6.
6. R. Li, P. Zhang, Y. Huang, P. Zhang, H. Zhong and Q. Chen, Pd-Fe<sub>3</sub>O<sub>4</sub>@C hybrid nanoparticles: preparation, characterization, and their high catalytic activity toward Suzuki coupling reactions, *J. Mater. Chem.*, 2012, **22**, 22750.
7. X. Chen, D. Qian, G. Xu, H. Xu, J. Dai and Y. Du, Magnetic Fe<sub>3</sub>O<sub>4</sub> supported PdAu bimetallic nanoparticles with the enhanced catalytic activity for Heck and Suzuki cross-coupling reactions, *Colloids Surf.*, 2019, **573**, 67-72.
8. M. Xiaojing, L. Gao, Z. Weng, H. Yang and X. Sun, Highly active PdCu/Graphene catalyst for Efficient Suzuki cross-coupling Reaction, *New J. Chem.*, 2020, **44**, 20525-20529.
9. X. Wang, W. Chen and L. Yan, Three-dimensional reduced graphene oxide architecture embedded palladium nanoparticles as highly active catalyst for the Suzuki-Miyaura coupling reaction, *Mater. Chem. Phys.*, 2014, **148**, 103-109.
10. S. Xia, Y. Yang and C. Liu, Quaternized POSS modified rGO-supported Pd nanoparticles as a highly efficient catalyst for reduction and Suzuki coupling reactions, *New J. Chem.*, 2019, **43**, 18601.

11. L. Sun, Q. Li, M. Zheng, S. Lin, C. Guo, L. Luo, S. Guo, Y. Li, C. Wang and B. Jiang, Efficient Suzuki-Miyaura cross-coupling reaction by loading trace Pd nanoparticles onto copper-complex-derived Cu/C-700 solid support, *J. Colloid Interface Sci.*, 2022, **608**, 2463-2471.
12. H. Kang, Y. E. Lee, P. V. G. Reddy, D. Sangeeta, S. E. Allen, K. A. Niederer and P. Sung, K. Hewitt. et. al., Asymmetric Oxidative Coupling of Phenols and Hydroxycarbazoles, *Org. Lett.*, 2017, **19**, 5505-5508.
13. (a) M. V. K. Reddy, G. Anusha and P. V. G. Reddy, Cu-N-heterocyclic carbene-catalyzed synthesis of 2-aryl-3-(arylethynyl) Quinoxalines from one-pot tandem coupling of *O*-phenylene diamines and terminal alkynes, *Appl Organomet. Chem.*, 2019, **33**, e5188(1-12). (b) G. Anusha, M. V. K. Reddy, Benzimidazole bearing Pd-PEPPSI complexes catalyzed direct C2-arylation/heteroarylation of N-substituted benzimidazoles, *Appl Organomet. Chem.*, 2020, **34**, e5869 (1-12). (c) M. Indira, G. Anusha, P. V. G. Reddy, Synthesis of environmentally benign new Ionic liquids for the preparation of 2-aryl/heteroaryl benzimidazoles/benzoxazoles under ultrasonication, *Sustain. Chem. Pharm.*, 2022, **30**, 100874.
14. P. M. Huang, and X. C. Wang, 9-Benzyl-3-bromo-9*H*-carbazole, *Acta. Crystallogr.E: Crystallogr.*, 2009, **65**, 2056-9890.
